# Supplementary material for: Emulating evolutionary processes to morph aureothin-type modular polyketide synthases and associated oxygenases
Source: PubMed Central journal article supplement (PMC6718629; doi:10.1038/s41467-019-11896-1), 2019-09-02
Supplement: 41467_2019_11896_MOESM1_ESM.pdf [file 41467_2019_11896_MOESM1_ESM.pdf]

# **Emulating evolutionary processes to morph aureothin-type modular polyketide synthases and associated oxygenases**

Peng *et al.*

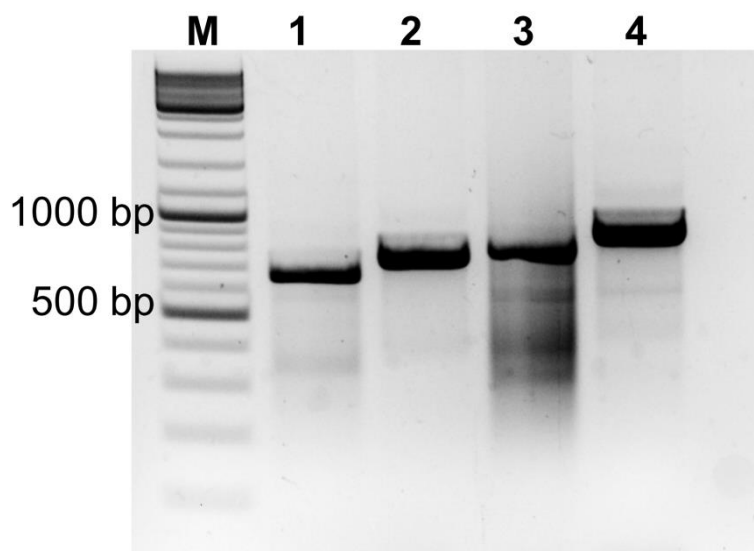

**Supplementary Figure 1. PCR confirmation of the missing *norB* gene in the *nor* biosynthetic gene cluster in *Streptomyces scabrisporus* DSM41855.** M: DNA size marker; primer pair (expected size): lane 1, NorAAfw-Ss/NorCrv-Ss (648 bp); 2, NorAAfw-Ss/NorCfw2-Ss (721 bp); 3, NorAAfw2-Ss/NorCfw-Ss (769 bp); and 4, NorAAfw2-Ss/NorCfw2-Ss (842 bp). Source data are provided as a Source Data file.

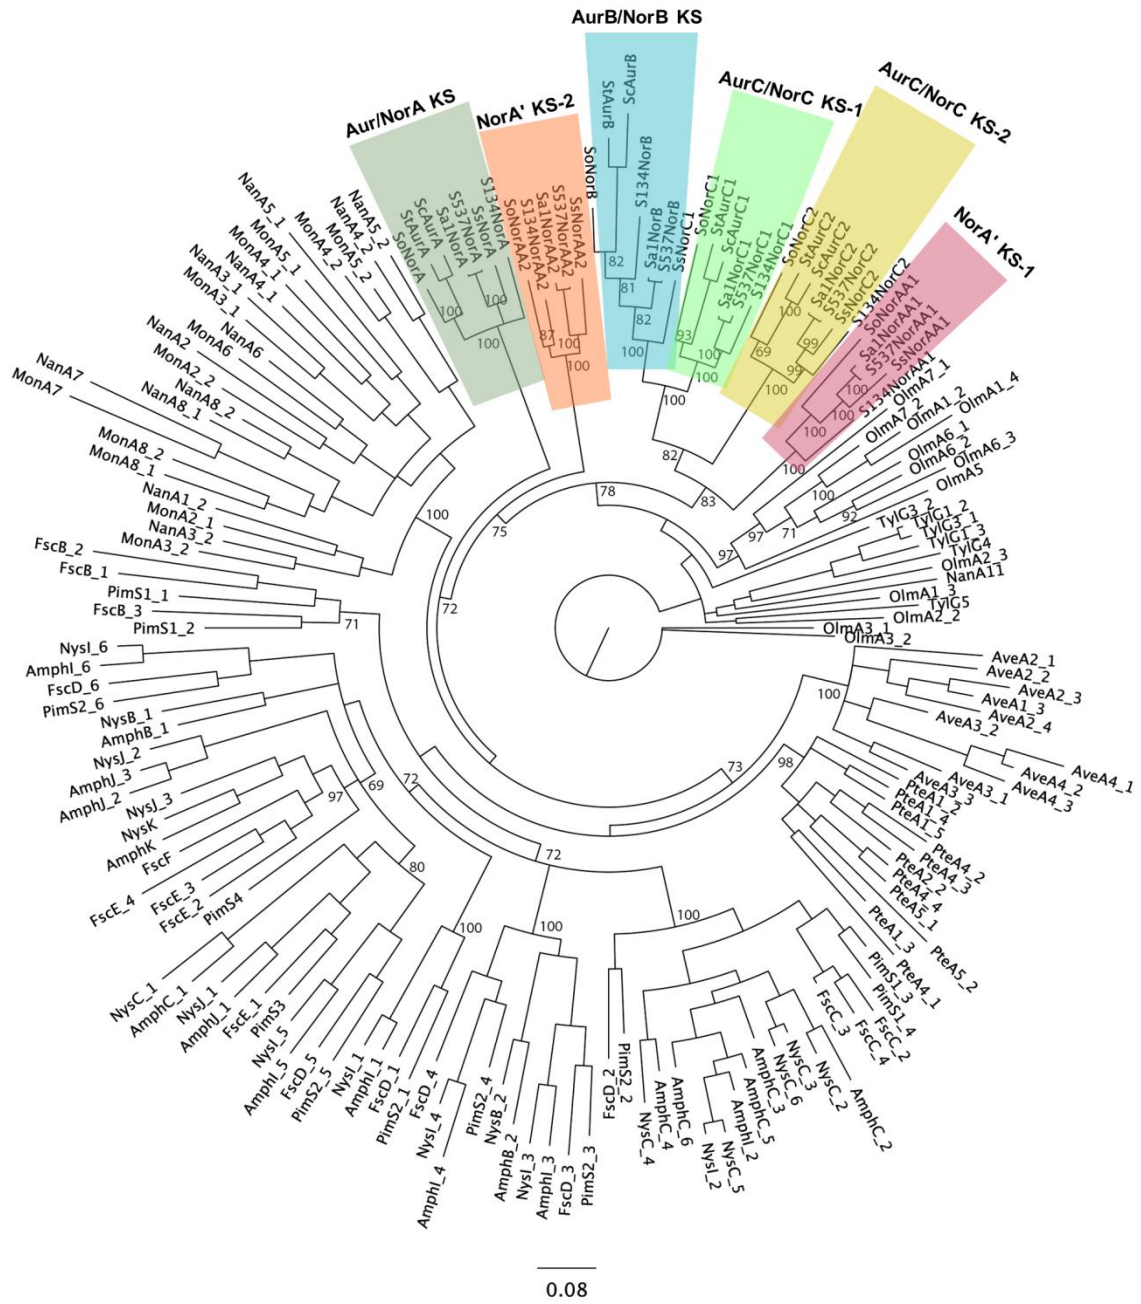

**Supplementary Figure 2. Phylogenetic tree of the KS amino acid sequences of the *aur*-type and *nor*-type PKSs and selected other type I PKSs.** The tree was reconstructed by Bayesian inference. Numbers at nodes indicated clade credibility values. Accession numbers of proteins used in this phylogenetic analysis are shown in Supplementary Table 2. Source data are provided as a Source Data file.

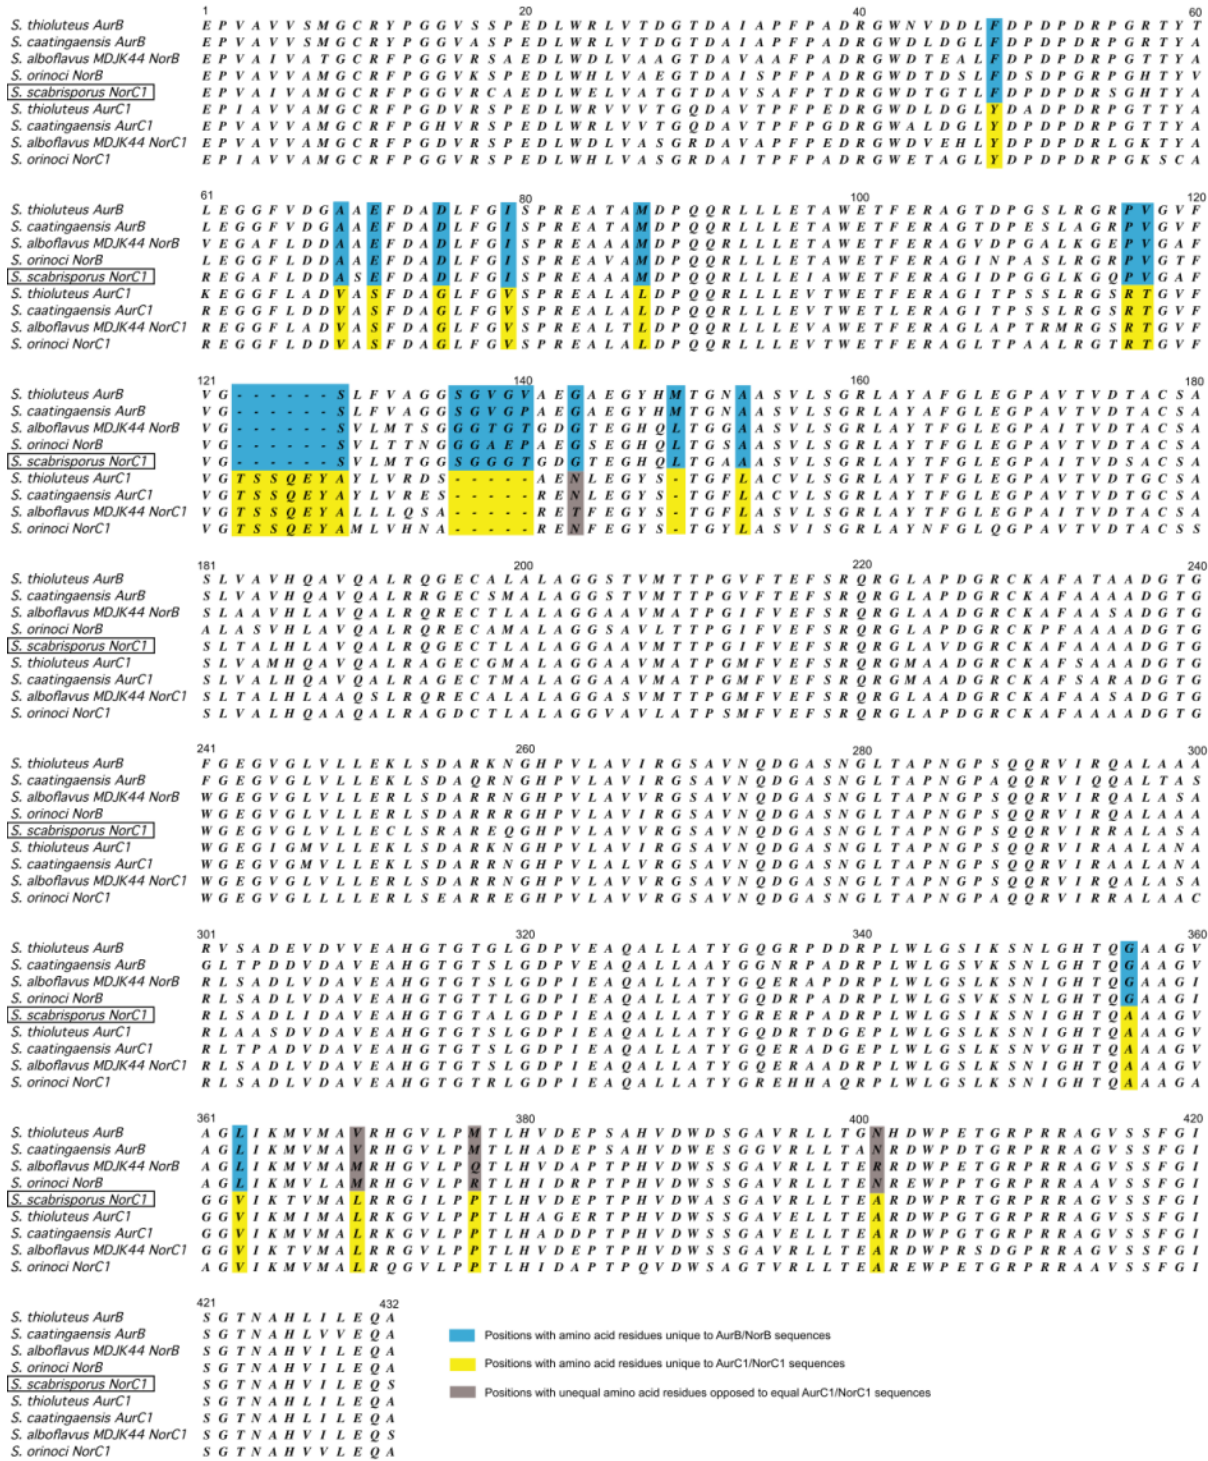

**Supplementary Figure 3. Amino acid sequence alignments.** Alignment of sequences of *S. scabrisporus* NorC-KS1 (NorC1) with selected AurB/NorB and AurC1/NorC1 (AurC1/NorC1) sequences. Columns with the same amino acid residue or indel pattern characteristic of AurB/NorB or NorC-KS1 sequences are highlighted in blue and yellow, respectively.



**a****Class 1a****C<sub>DD</sub>**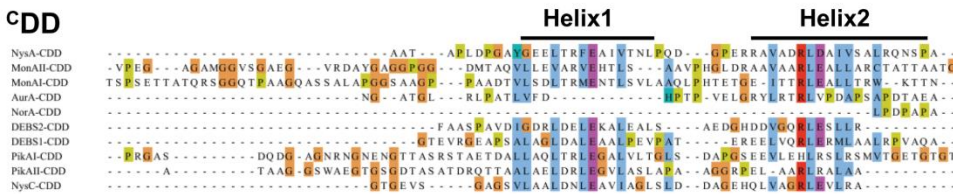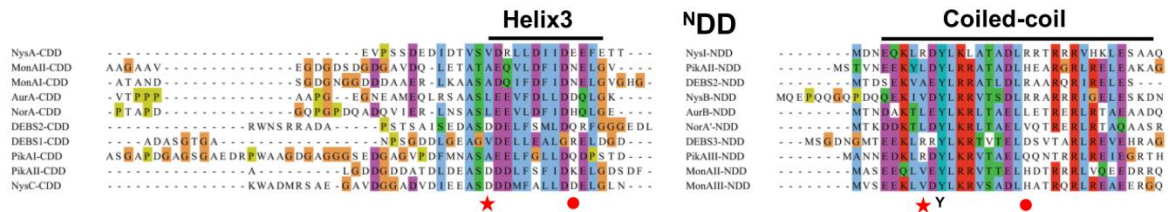**Class 1b****C<sub>DD</sub>**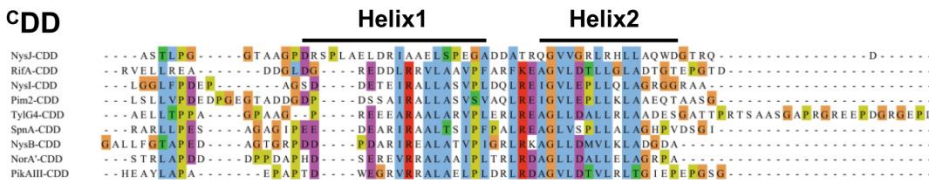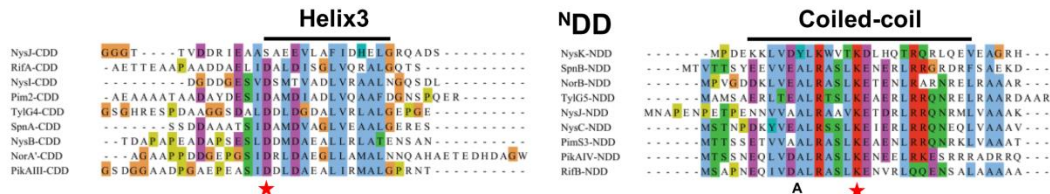**b**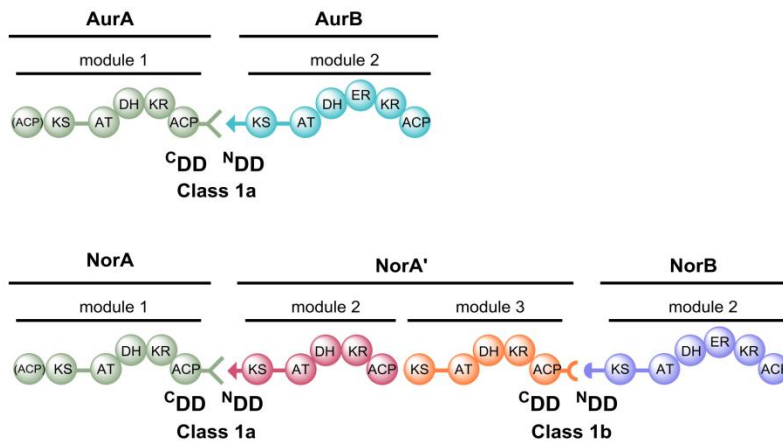

**Supplementary Figure 4. The interactions between the type I polyketide C- and N-docking domains.** a) Amino acid sequence alignment of docking domains in the *aur* PKS and *nor* PKS with other known docking domains; class 1a and class 1b<sup>1-5</sup>. The alignment is constructed by Clustal Omega<sup>6</sup> and shows default Clustal color scheme by Jalview 2.10.5<sup>7</sup> (<http://www.jalview.org/>). DEBS: erythromycin<sup>8</sup> (*Saccharopolyspora erythraea*), Pik: pikromycin<sup>9</sup> (*Streptomyces venezuelae*), Amph: amphotericin<sup>10</sup> (*Streptomyces nodosus*), Asm: ansamitocin<sup>11</sup> (*Actinosynnema pretiosum*), Nys: nystatin<sup>12</sup> (*Streptomyces noursei* ATCC 11455), Mon: monensin<sup>13</sup> (*Streptomyces cinnamonensis*), Spn: spinosad<sup>14</sup> (*Saccharopolyspora spinosa*), Tyl: tylactone<sup>15</sup> (*Streptomyces fradiae*), Pim: pimarinin<sup>16</sup> (*Streptomyces natalensis*). Rif: rifamycin<sup>17</sup> (*Amycolatopsis mediterranei*). Colored and

shaded boxes indicate basic residues (red), acidic residues (magenta), hydrophobic residues (blue), polar residues (green), aromatic residues (cyan), Gly (orange), and Pro (yellow). Potential charge-charge interactions between <sup>C</sup>DD (C-terminal docking domain) and <sup>N</sup>DD (N-terminal docking domain) are indicated by matching symbols (red star and circle). **Y** and **A** are well conserved amino acid in this position of <sup>N</sup>DD in class 1a and class 1b, respectively<sup>5</sup>. **b)** AurA/AurB and NorA/NorA' docking domains are a class 1a. On the other hand NorA'/NorB docking domain is a class 1b.



NorB. The amino acid sequences of NorB, AurB\*, AurB\*\*, AurB, AurB\*-NorA'-module2 and NorB\*-AurB\*-module4 were submitted to phyre2<sup>19</sup> for modeling. Obtained the most similar structure model is the mammal fatty acid structure 2VZ8<sup>20</sup> (88% coverage, 28% identity). All the six models are based on 2VZ8 and then showed the same 3D structure model.



**a**

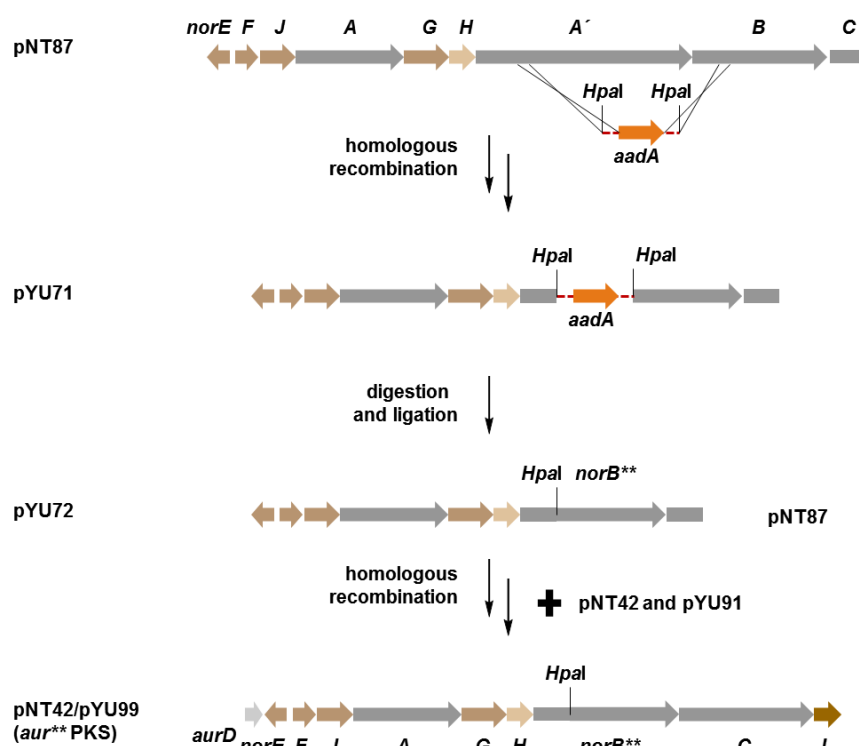

**b**

fusion site in KS-AT linker:

|                       |                                                                                                 |
|-----------------------|-------------------------------------------------------------------------------------------------|
| <i>norA</i> '-module2 | -CCC CCG GCC GAG GAC AAC CCC AGC CGG CCG CTC TCC CCG-<br>P P A E D N P S R P L S P              |
| <i>norB</i>           | -GAA GGG GAG ATG ACG GAC GGG CCG GAG GGC GCG GAC ATC-<br>E G E M T D G P E G A D I              |
| <i>norB</i> **        | -CCC CCG GCC GAG GAC <u>GTTAAC</u> CCG GAG GGC GCG GAC ATC-<br>P P A E D <u>V N</u> P E G A D I |

**Supplementary Figure 6. Schematic strategy to generate the *aur*\*\* PKS.** a) Workflow to generate the *aur*\*\* PKS: *norA*' and *norB* are fused at the KS-AT linker of *norA*'-module 2. b) Nucleotide/amino acid sequences of the original and fusion sites in the KS-AT linker regions. The fusion site *Hpal* is highlighted in red.

|                                  |     |                                                                                    |
|----------------------------------|-----|------------------------------------------------------------------------------------|
| AurH- <i>S. thioluteus</i>       | 1   | -MSTTAAHTEPSPWADLPFLDITDPNFSWDSPEVAEAREKSWIARTPLALLVLRVYAEADQLA                    |
| AurH- <i>S. caatingaensis</i>    | 1   | MSIPTAPTTPSPWADLPFLDITDPNFSWDSPEVAEAREKSWIARTPLALLVLRVYAEADQLA                     |
| NorH- <i>S. orinoci</i>          | 1   | -MSTAPTTEPSPWQDLPFLDITSPGFAWDSPEVAAAREKSWIARTPMGLLVLRVYAEAHLSL                     |
| NorH- <i>S. sp. NRRL B-1347</i>  | 1   | -MITTVEETETAWENLPFLDITDPAFVWDSAEVAEAREKSWIAGTPLGLLVLRVYAEAHLSL                     |
| NorH- <i>S. scabrisporous</i>    | 1   | -MSTVEGSGALRQVLPFLDITVPDFVWDSPEVAEAREKSWIAGTPLGLLVLRVYAEAHLSL                      |
| NorH- <i>S. alboflavus</i> MJK44 | 1   | -MSTVAESGTSWQDLPFLDITVPDFVWDSPEVAEAREKSWIAGTPLGLLVLRVYAEAHLSL                      |
| NorH- <i>S. ruber</i> ISP-5378   | 1   | -MSTVAESGTSWQDLPFLDITVPDFVWDSPEVAEAREKSWIAGTPLGLLVLRVYAEAHLSL                      |
| consensus                        | 1   | .....****.* * ****.* * ****.* * ****.* * ****.* * ****.* * ****.* * ****.*         |
|                                  |     |                                                                                    |
| AurH- <i>S. thioluteus</i>       | 60  | RDKRLISGFRGLVDMVGTPEGPVRDFMVDLQSLDGDHRRRLRGLATHPFTPRRITAVQAP                       |
| AurH- <i>S. caatingaensis</i>    | 61  | RDKRLISGFRGLVDMVGTPEGPVRDFMVDLQSLDGDHRRRLRGLATHPFTPRRITAVQAP                       |
| NorH- <i>S. orinoci</i>          | 60  | RDARLVSGFRDLDVLDVGGPSSGIVRDFMRDFMQLSLEGPDRHRLRGLVTHAFTSRRTALRP                     |
| NorH- <i>S. sp. NRRL B-1347</i>  | 60  | RDARLVSGFRDLDVLDVGGPSSGIVRDFMRDFMQLSLEGPDRHRLRGLVTHAFTSRRTALRP                     |
| NorH- <i>S. scabrisporous</i>    | 60  | RDARLVSGFRDLDVLDVGGPSSGIVRDFMRDFMQLSLEGPDRHRLRGLVTHAFTSRRTALRP                     |
| NorH- <i>S. alboflavus</i> MJK44 | 60  | RDARLVSGFRDLDVLDVGGPSSGIVRDFMRDFMQLSLEGPDRHRLRGLVTHAFTSRRTALRP                     |
| NorH- <i>S. ruber</i> ISP-5378   | 60  | RDARLVSGFRDLDVLDVGGPSSGIVRDFMRDFMQLSLEGPDRHRLRGLVTHAFTSRRTALRP                     |
| consensus                        | 61  | ** ** ** ** ** * * * * * * * * * * * * * * * * * * * * * * * * * * * * * * * * * * |
|                                  |     |                                                                                    |
| AurH- <i>S. thioluteus</i>       | 120 | FVRSTVEQLIDKLP--QGDFDFVQHFPHPALPALVMCQLLGFPLEDYDTVGRLSIETNLGL                      |
| AurH- <i>S. caatingaensis</i>    | 121 | FVRSTVERLVDLDP--DGEFDFVKHFAHPLPALVMCQLLGFPLEDYDTVGRLSVETNLGL                       |
| NorH- <i>S. orinoci</i>          | 120 | FIRDTAERLAGELAT--AGDCDFVAAFADPLPAAVVCCELLGFPPQEDQATVGHWCNTNLVA                     |
| NorH- <i>S. sp. NRRL B-1347</i>  | 120 | FIRATAERLADELAATGGCEFFVSAYADPLPAAVVCCELLGFPPQEDQATVGRWCNTNLVL                      |
| NorH- <i>S. scabrisporous</i>    | 120 | FVRATAERLADELA--GGERDFVDAFADPLPAAVVCCELLGFPPADYATVGRWCNTNLVL                       |
| NorH- <i>S. alboflavus</i> MJK44 | 120 | FIRATAERLAGELAA--GGERDFVAAFADPLPAAVVCCELLGFPAEDHAMVGRWCNTNLVL                      |
| NorH- <i>S. ruber</i> ISP-5378   | 120 | FIRATAERLADELA--GGERDFVAAFADPLPAAVVCCELLGFPAEDHAMVGRWCNTNLVL                       |
| consensus                        | 121 | * * * * * * * * * * * * * * * * * * * * * * * * * * * * * * * * * * * * * * * *    |
|                                  |     |                                                                                    |
| AurH- <i>S. thioluteus</i>       | 178 | ALSNDDQILVQVEQGLGRMFDYLVAAATEKRVKVEPGDDLTSDIIVRAF--HDGVLDDYELRTL                   |
| AurH- <i>S. caatingaensis</i>    | 179 | ALSSDRDVLVQVEQGLGRMFDYLVAAATEKRVKADPGDDLTSDIIVRAF--HDGVLDDYELRTL                   |
| NorH- <i>S. orinoci</i>          | 179 | ALG-DLSLVNRVEEALSGMYAYFDTVFPKLRANPGDDLSDILRAQREQNALDEDELRTL                        |
| NorH- <i>S. sp. NRRL B-1347</i>  | 180 | ALGPDQSRVSEVEEGLAGMYGYFEKVVQKLRANPGDDLSDILRAQREDDALDDRELRTL                        |
| NorH- <i>S. scabrisporous</i>    | 179 | ALGPDQSRVAEVEEGLAGMYDYFDTVIRERQAKPGDDLSDILRAEQEDGALDDRELRTL                        |
| NorH- <i>S. alboflavus</i> MJK44 | 179 | ALGPDQSRVSEVEEGLAGMYDYFDTVIQERKADLGGDLSDILRAQEDGALDDRELRTL                         |
| NorH- <i>S. ruber</i> ISP-5378   | 179 | ALGPDQSRVSEVEEGLAGMYDYFDTVIQERKADLGGDLSDILRAQEDGALDDRELRTL                         |
| consensus                        | 181 | * * * * * * * * * * * * * * * * * * * * * * * * * * * * * * * * * * * * * * * *    |
|                                  |     |                                                                                    |
| AurH- <i>S. thioluteus</i>       | 237 | VATVLVAGYTTIHLALAMFAHPDQWIKELAPLAPQAVEEVLRWPTLPVATR                                |
| AurH- <i>S. caatingaensis</i>    | 238 | VATVLVAGYETTINHLALAMYDFAQHPDQWMLKENPGLAPQAVEEVLRWPTLPVATR                          |
| NorH- <i>S. orinoci</i>          | 238 | VATLLVAGFQTTSHQGHAMVAFAAHPGQWLLLRERPELAPQAVEEVLRWAPTITVVATK                        |
| NorH- <i>S. sp. NRRL B-1347</i>  | 240 | IATLLVAGYQTTSHQIGHAMVAFSEHPQWALLRERPELAPQAVEEVLRWCPITVVATK                         |
| NorH- <i>S. scabrisporous</i>    | 239 | IATLLVAGYQTTSHQLGHAMVAFAAHPQWLLRERPELVTQAVEEVLRWCPITVVATK                          |
| NorH- <i>S. alboflavus</i> MJK44 | 239 | IATLLVAGYQTTSHQLGHAMVAFAAHPQWLLRERPELVTQAVEEVLRWCPITVVATK                          |
| NorH- <i>S. ruber</i> ISP-5378   | 239 | IATLLVAGYQTTSHQLGHAMVAFAAHPQWLLRERPELVTQAVEEVLRWCPITVVATK                          |
| consensus                        | 241 | * * * * * * * * * * * * * * * * * * * * * * * * * * * * * * * * * * * * * * * *    |
|                                  |     |                                                                                    |
| AurH- <i>S. thioluteus</i>       | 297 | VAAEDFEVNGVRIPTGTVPVFMCAHVAHRDPRVFAADRFDITVKREAPSIAFGGGPHFCL                       |
| AurH- <i>S. caatingaensis</i>    | 298 | TAAEDFEVNGVRIPTGTVPVFMCAHVAHRDPRVFAADRFDITVKREAPSIAFGGGPHFCL                       |
| NorH- <i>S. orinoci</i>          | 298 | SAEEDFEVNGLHSPAGTPVWLCASQAQRDPVFDGDAFDITVKREAGTLAFGGGAHYCL                         |
| NorH- <i>S. sp. NRRL B-1347</i>  | 300 | AAAETFTYNDLHSPAGTPVWLCASQAQRDPVFDGDRFDITVVERKPGTLAFGGGTHFCL                        |
| NorH- <i>S. scabrisporous</i>    | 299 | SAEEDFSVNGYPTISKGTVPVWLCASQAQRDPVFDGDAFDITVREASPLAFGGGAHYCL                        |
| NorH- <i>S. alboflavus</i> MJK44 | 299 | SAEEDFSVNDLRIQAGTPVWLCASQAQRDPVFDGDAFDITVKREASPLAFGGGAHYCL                         |
| NorH- <i>S. ruber</i> ISP-5378   | 299 | SAEEDFSVNDLRIQAGTPVWLCASQAQRDPVFDGDAFDITVKREASPLAFGGGAHYCL                         |
| consensus                        | 301 | * * * * * * * * * * * * * * * * * * * * * * * * * * * * * * * * * * * * * * * *    |
|                                  |     |                                                                                    |
| AurH- <i>S. thioluteus</i>       | 357 | GALARLELEAVALARLDPPIAGITWRGLVGPDLPLRFGAA---                                        |
| AurH- <i>S. caatingaensis</i>    | 358 | GALARLELEAVALARLDPPQITGDIITWRHELGVAGPDLPLRFGAA---                                  |
| NorH- <i>S. orinoci</i>          | 358 | GAALARVETAEALQVLTARLDPPRITGEISWRPEITGVSGPDVPLRFGAA---                              |
| NorH- <i>S. sp. NRRL B-1347</i>  | 360 | GAALARVETAEALQVLTARLDAPQVITGPIITWRPSITGVSGPDVPLRFGAAQ---                           |
| NorH- <i>S. scabrisporous</i>    | 359 | GAALARVELAEAFALARLDPPVAGPITWRPSITGVSGPDVPLRFGAAPTGA                                |
| NorH- <i>S. alboflavus</i> MJK44 | 359 | GAALARVELAEAFDVLAARLDPPVAGPITWRPSITGVSGPDVPLRFGAAGA-                               |
| NorH- <i>S. ruber</i> ISP-5378   | 359 | GAALARVELAEAFDVLAARLDPPVAGPITWRPSITGVSGPDVPLRFGAAGA-                               |
| consensus                        | 361 | * * * * * * * * * * * * * * * * * * * * * * * * * * * * * * * * * * * * * * * *    |

### Supplementary Figure 7. Amino acid sequence alignment of AurH and homologues.

The alignment is constructed by Clustal Omega and shaded similar (gray)/identical (black) residues by BoxShade ([https://embnet.vital-it.ch/software/BOX\\_form.html](https://embnet.vital-it.ch/software/BOX_form.html)). The same residues and similar residues are indicated by star and dot, respectively. The catalytic glutamine is highlighted in red and the conserved cysteine binding to heme is in cyan. The residues important for the size of the catalytic cavity are in green (AurH homologues) and purple (NorH homologues), and they are conserved in AurH and NorH, respectively.

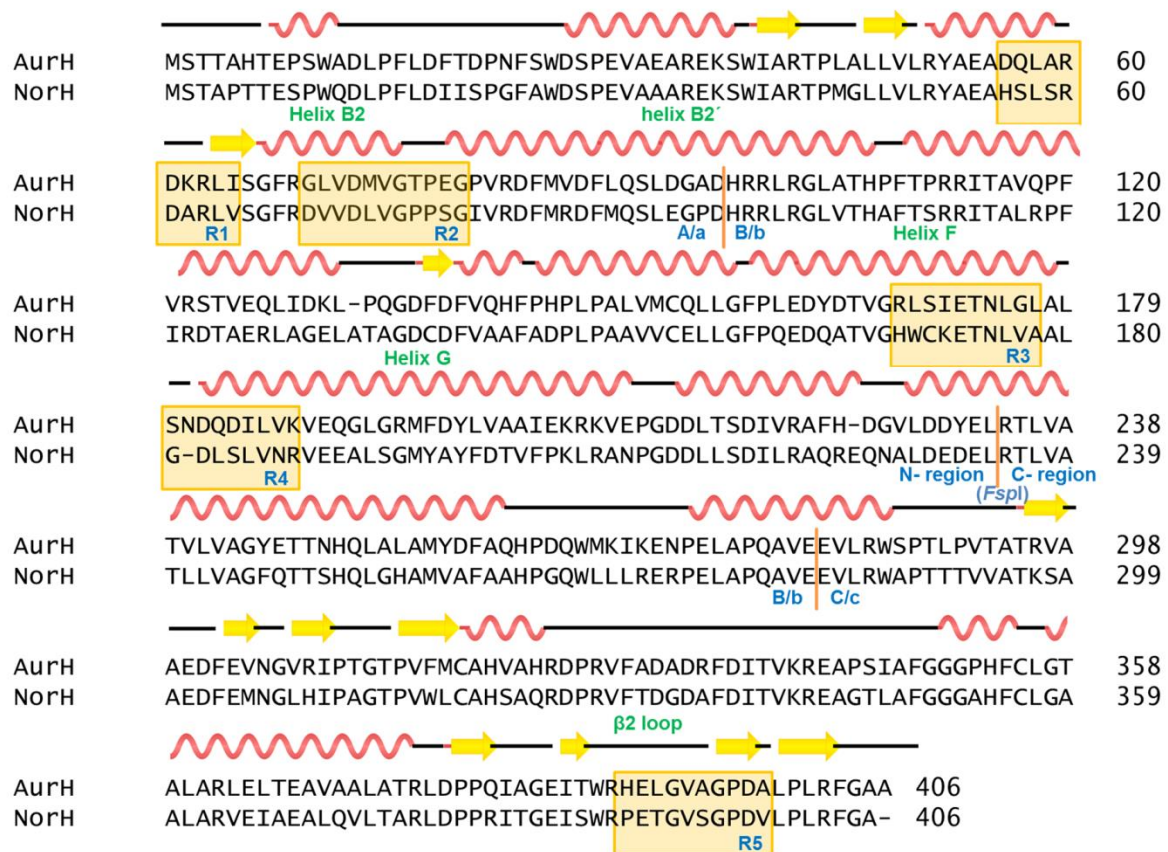

**Supplementary Figure 8. Strategies to construct chimeric NorH variants and hybrid NorH/AurH variants.** Five swapped regions of NorH are shaded in orange. The combination sites for hybrid NorH/AurH variants constructs are indicated by vertical orange lines.

**a**

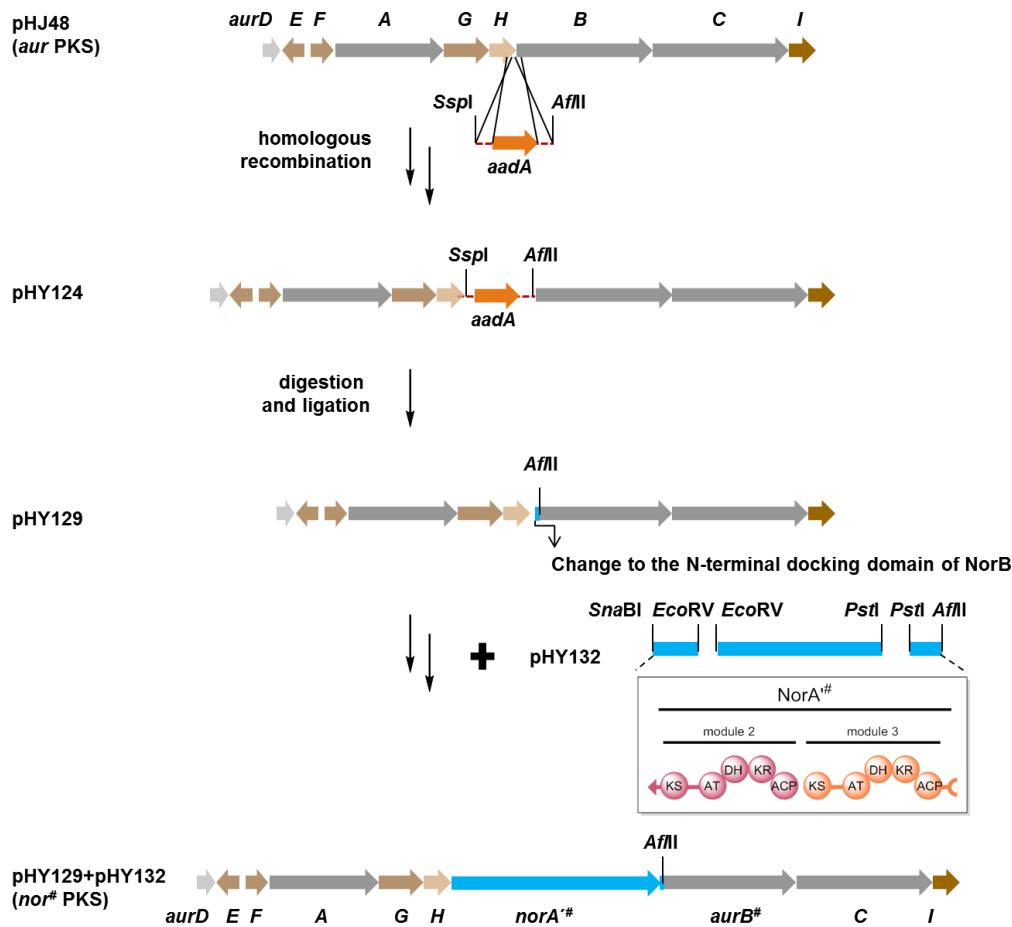

**b**

fusion site in docking domain:

|                          |                                                                                                                    |
|--------------------------|--------------------------------------------------------------------------------------------------------------------|
| <i>aurB</i>              | -CGC ACC GCG GAG GCC GCG GAC CAG GAG CCC GTC GCG GTG GTG TCA ATG-<br>R T A E A A D Q E P V A V V S M               |
| <i>norB</i>              | -CGG GAG CTG CGG GCC GCC CGG GAA CCG GTG GCG GTG GTG GCC ATG-<br>R E L R A A A R E P V A V V A M                   |
| <i>aurB</i> <sup>#</sup> | -CGG GAG CTG CGG GCC GCC <u>CTT AAG</u> GAG CCC GTC GCG GTG GTG TCA ATG-<br>R E L R A A <u>L K</u> E P V A V V S M |

**Supplementary Figure 9. Schematic strategy to generate the *nor*<sup>#</sup> PKS.** a) Workflow to generate the *nor*<sup>#</sup> PKS: the N-terminal docking domain of *aurB* is swapped with that of *norB* to generate pHY129, and *norA*<sup>#</sup> including the N- and C-terminal docking domains is expressed separately as pHY132. b) Nucleotide/amino acid sequences of the original and fusion sites in the docking domain regions. The fusion site *AflI* is highlighted in red.

**a**

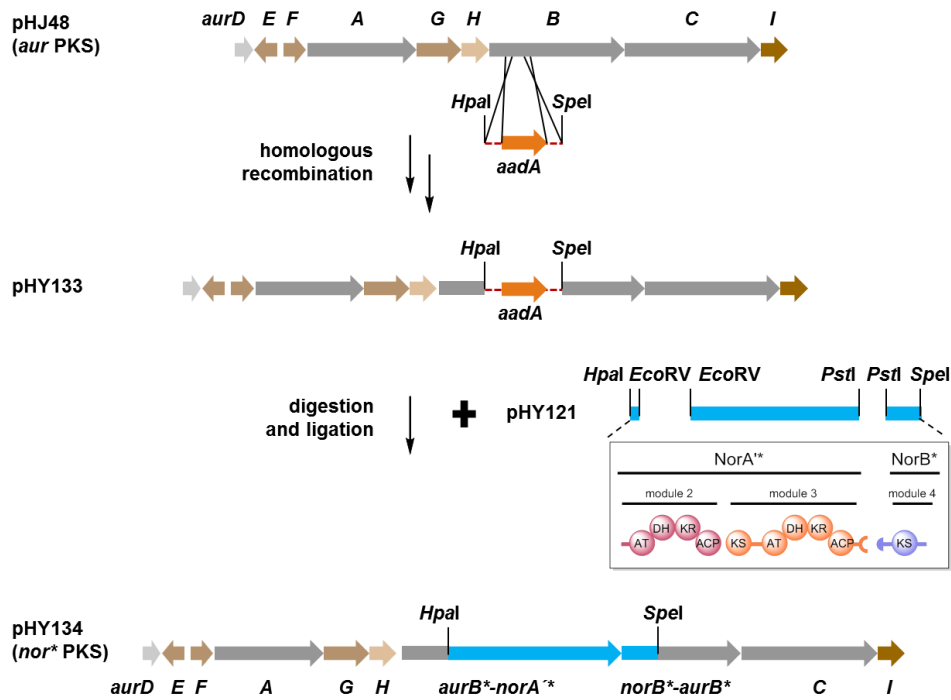

**b**

fusion site in KS-AT linker:

|                    |                                                                      |
|--------------------|----------------------------------------------------------------------|
| <i>aurB</i>        | -CCC GAT GCG GAG GAG TCG GAC GCG GAG CCC GCG TCC GGC GCG CCC-        |
|                    | P D A E E S D A E P A S G A P                                        |
| <i>aurB*-norA*</i> | -CCC GAT GCG GAG GAG TCG <u>GIT AAC</u> CCC AGC CGG CCG CTC TCC-     |
|                    | P D A E E S <u>V N</u> P S R P L S                                   |
| <i>norB*-aurB*</i> | -CCG GCA GAA GGG <u>ACT AGT</u> GAC GCG GAG CCC GCG TCC GGC GCG CCC- |
|                    | P A E G <u>T S</u> D A E P A S G A P                                 |

**Supplementary Figure 10. Schematic strategy to generate the *nor\** PKS.** a) Workflow to generate the *nor\** PKS: the region between the *norA*'-AT2 and *norB*-KS4 (*norA*'\*-*norB*\*) is inserted into the KS-AT linker of *aurB* to generate pHY134. b) Nucleotide/amino acid sequences of the original and fusion sites in the KS-AT linker regions. The fusion sites *HpaI* and *SpeI* are highlighted in red.

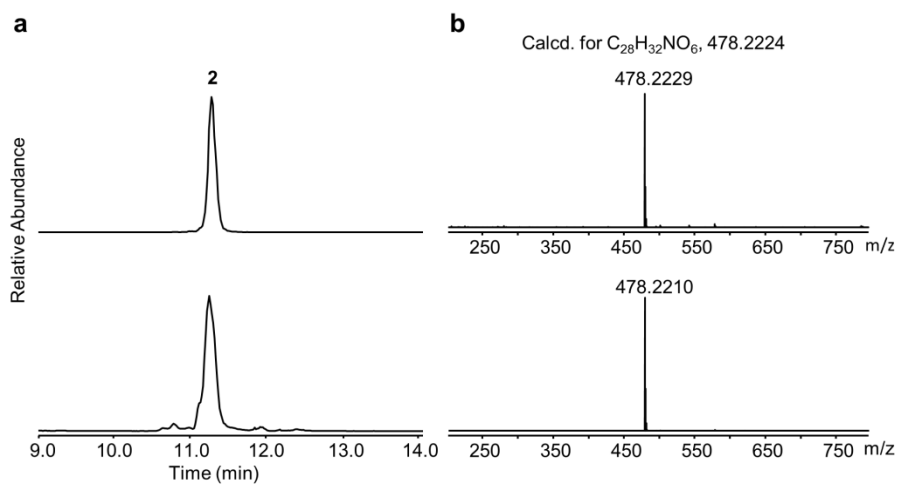

**Supplementary Figure 11. The HPLC-HRMS profiles at extracted ion chromatogram. a)** The HPLC-HRMS profile at EIC  $m/z$  477.70–478.70  $(M+H)^+$  of authentic reference of neoareothin (**2**, upper panel), and the ethyl acetate extracts from *S. scabrisporus* culture (lower panel). **b)** Observed ions corresponding to those of **a**.



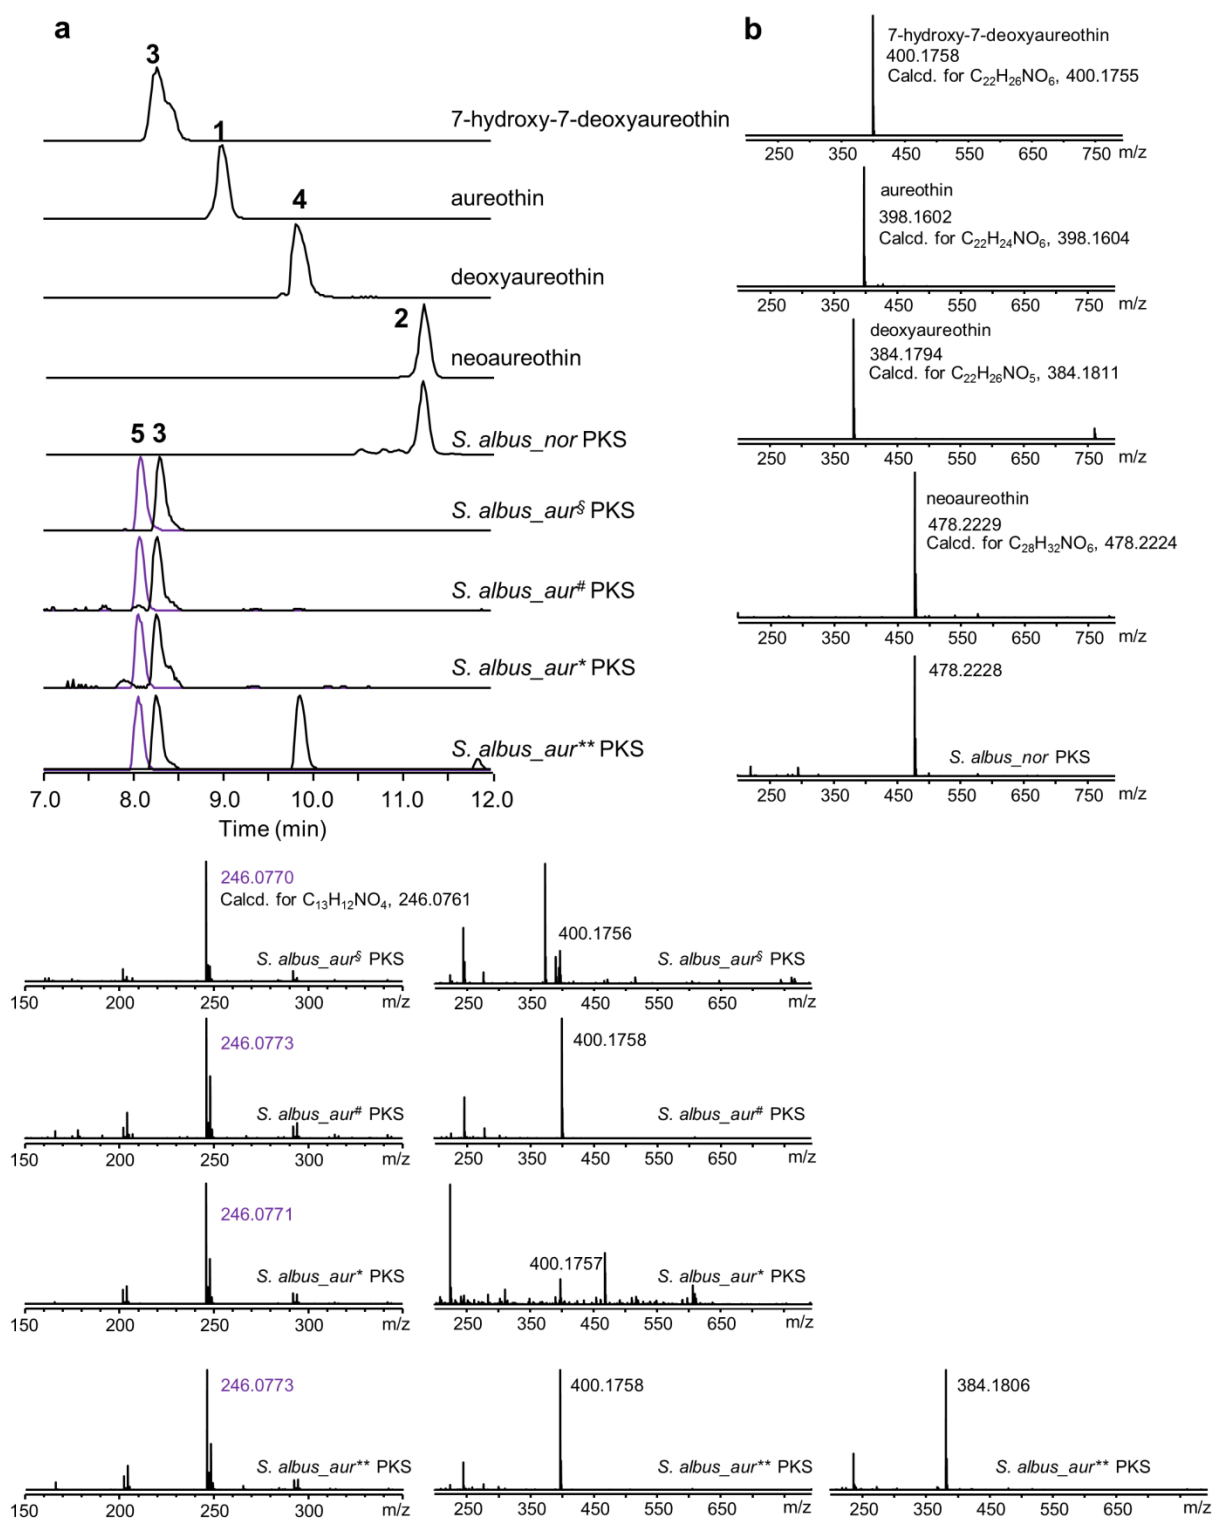

**Supplementary Figure 12. HPLC-HRMS profiles at extracted ion chromatogram. a)** The HPLC-HRMS profile at EIC  $m/z$  399.67-400.67 ( $M+H$ )<sup>+</sup> of authentic reference of 7-hydroxy-7-deoxyaureothin (3), *S. albus\_aur*<sup>δ</sup> PKS, *S. albus\_aur*<sup>#</sup> PKS, *S. albus\_aur*<sup>\*</sup> PKS, *S. albus\_aur*<sup>\*\*</sup> PKS, EIC  $m/z$  397.65-398.65 ( $M+H$ )<sup>+</sup> of authentic reference of aureothin (1), EIC  $m/z$  477.72-478.72 ( $M+H$ )<sup>+</sup> of authentic reference of neo-aureothin (2) and *S. albus\_nor* PKS, EIC  $m/z$  383.68-384.68 ( $M+H$ )<sup>+</sup> of authentic reference of 7-deoxyaureothin (4) and *S.*

*albus\_aur*<sup>\*\*</sup> PKS, EIC *m/z* 245.57-246.57 (M-H)<sup>-</sup> for intermediate (**5**, purple), of *S. albus\_aur*<sup>§</sup> PKS, *S. albus\_aur*<sup>#</sup> PKS, *S. albus\_aur*<sup>\*</sup> PKS, *S. albus\_aur*<sup>\*\*</sup> PKS. **b)** Observed ions corresponding to those of **a**.

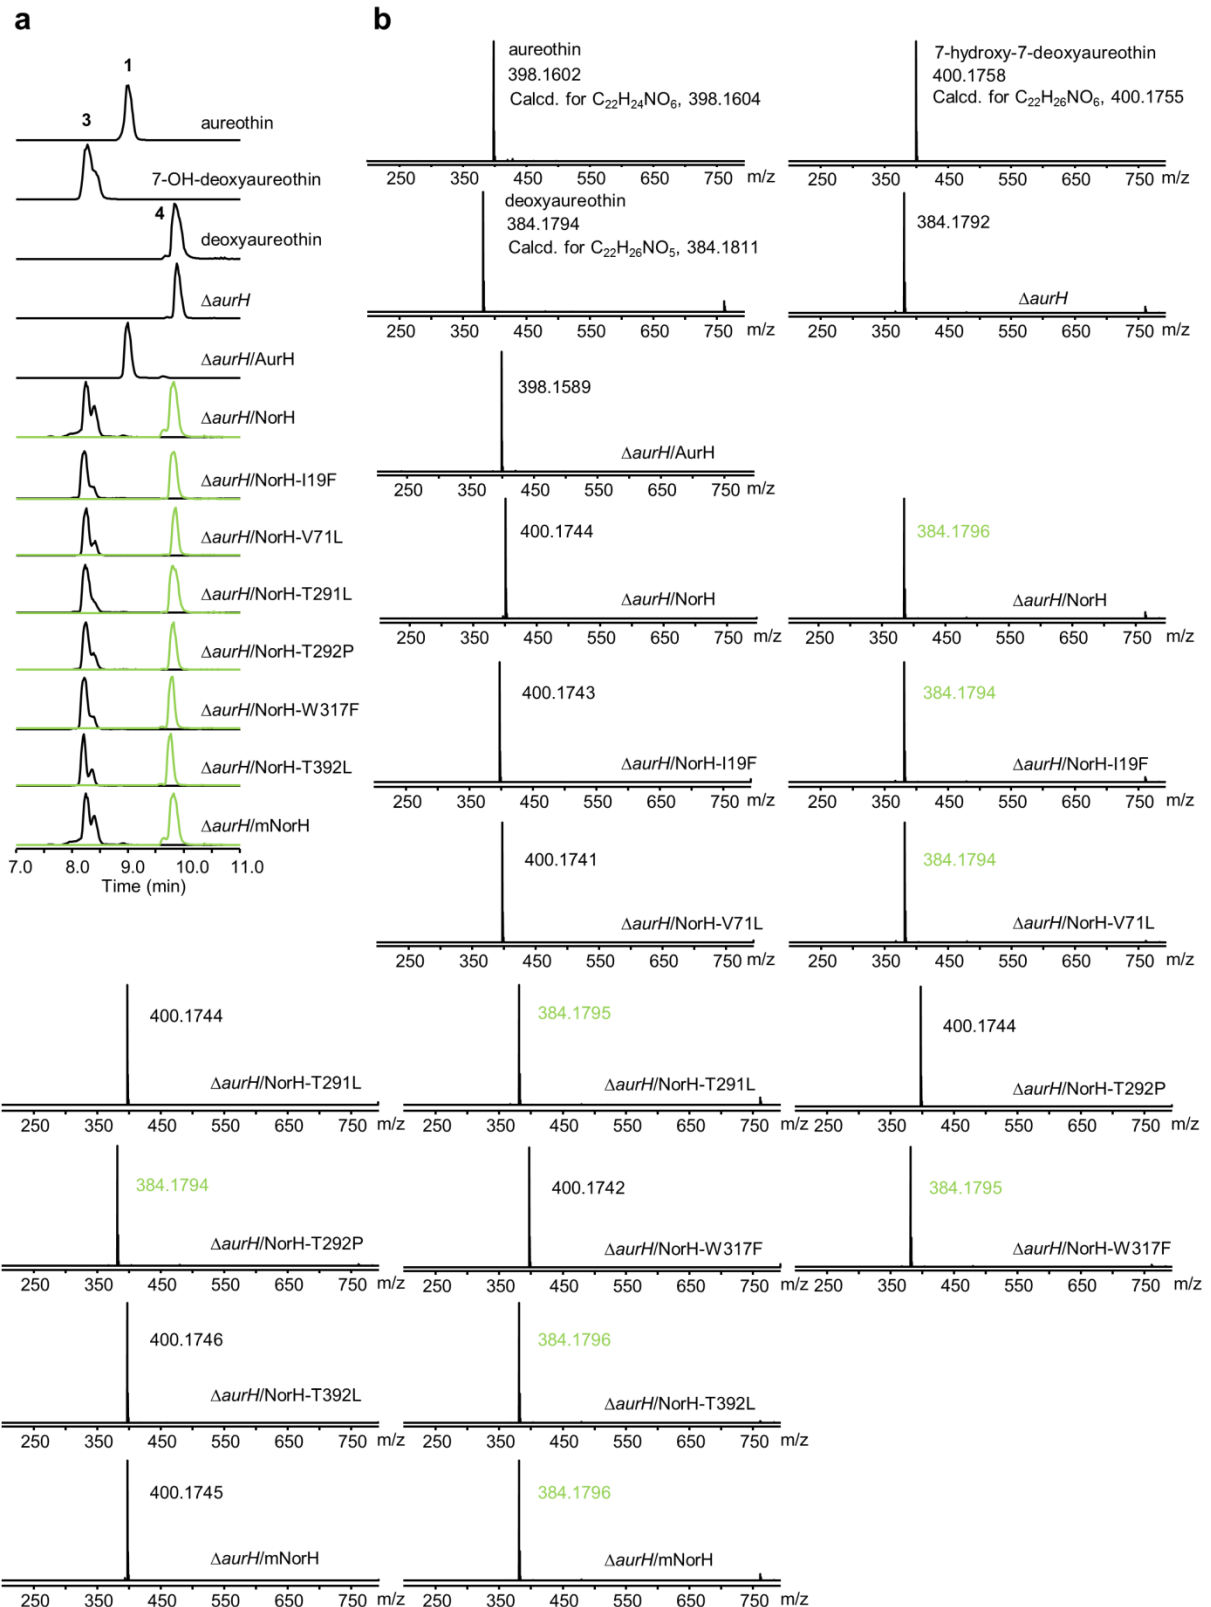

**Supplementary Figure 13. The HPLC-HRMS profiles at extracted ion chromatogram (EIC). a)** The HPLC-HRMS profile at EIC  $m/z$  397.65-398.65 ( $M+H$ )<sup>+</sup> of authentic reference of aureothin (1) and  $\Delta$ aurH/AurH, EIC  $m/z$  399.67-400.67 ( $M+H$ )<sup>+</sup> of authentic reference of 7-OH-deoxyaureothin (3),  $\Delta$ aurH/NorH,  $\Delta$ aurH/NorH-I19F,  $\Delta$ aurH/NorH-V71L,  $\Delta$ aurH/NorH-T291L,  $\Delta$ aurH/NorH-T292P,  $\Delta$ aurH/NorH-W317F,  $\Delta$ aurH/NorH-T392L,  $\Delta$ aurH/multiple-point-

mutated NorH, EIC  $m/z$  383.67-384.67 (M+H)<sup>+</sup> of 7-deoxyaureothin (**4**, yellowgreen),  $\Delta aurH$ ,  $\Delta aurH/NorH$ ,  $\Delta aurH/NorH-I19F$ ,  $\Delta aurH/NorH-V71L$ ,  $\Delta aurH/NorH-T291L$ ,  $\Delta aurH/NorH-T292P$ ,  $\Delta aurH/NorH-W317F$ ,  $\Delta aurH/NorH-T392L$ ,  $\Delta aurH/multiple-point-mutated$  NorH. **b)** Observed ions corresponding to those of **a**.

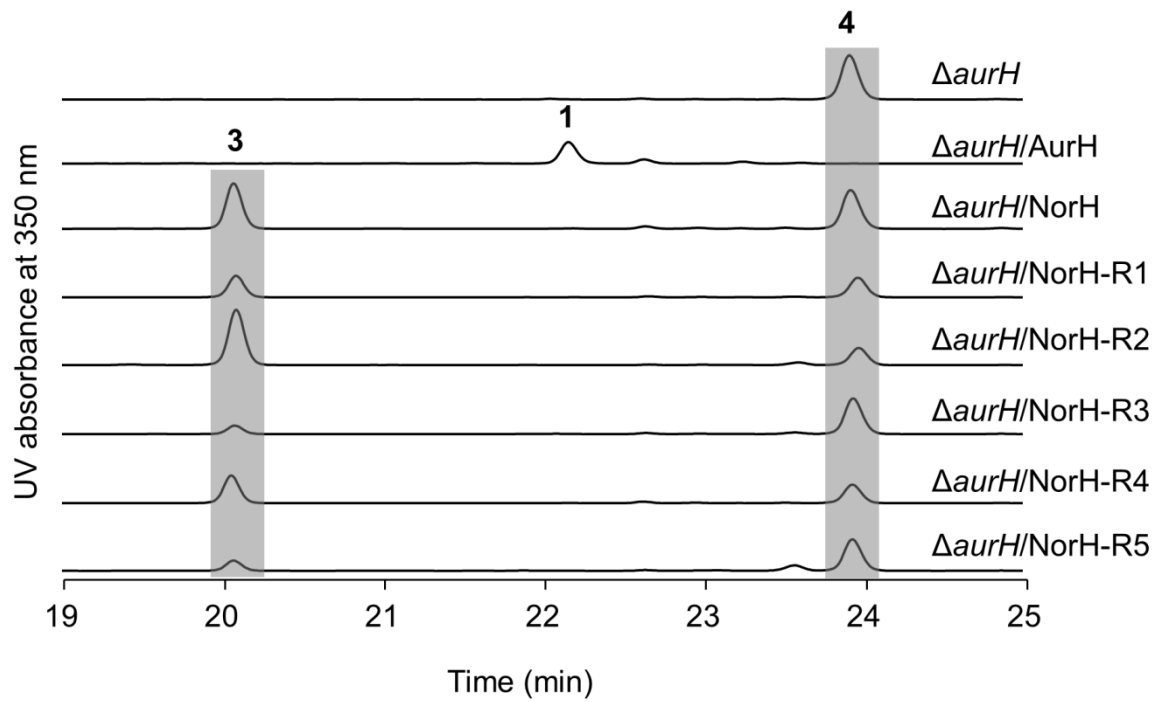

**Supplementary Figure 14. HPLC profile of region-swapped chimeric NorHs.** The EtOAc extracts of *S. albus* pHJ68 ( $\Delta aurH$ ),  $\Delta aurH/AurH$ ,  $\Delta aurH/NorH$ ,  $\Delta aurH/NorH-R1$ ,  $\Delta aurH/NorH-R2$ ,  $\Delta aurH/NorH-R3$ ,  $\Delta aurH/NorH-R4$ , and  $\Delta aurH/NorH-R5$  mutant strains. Aureothin (**1**), 7-OH deoxyaureothin (**3**), 7-deoxyaureothin (**4**).

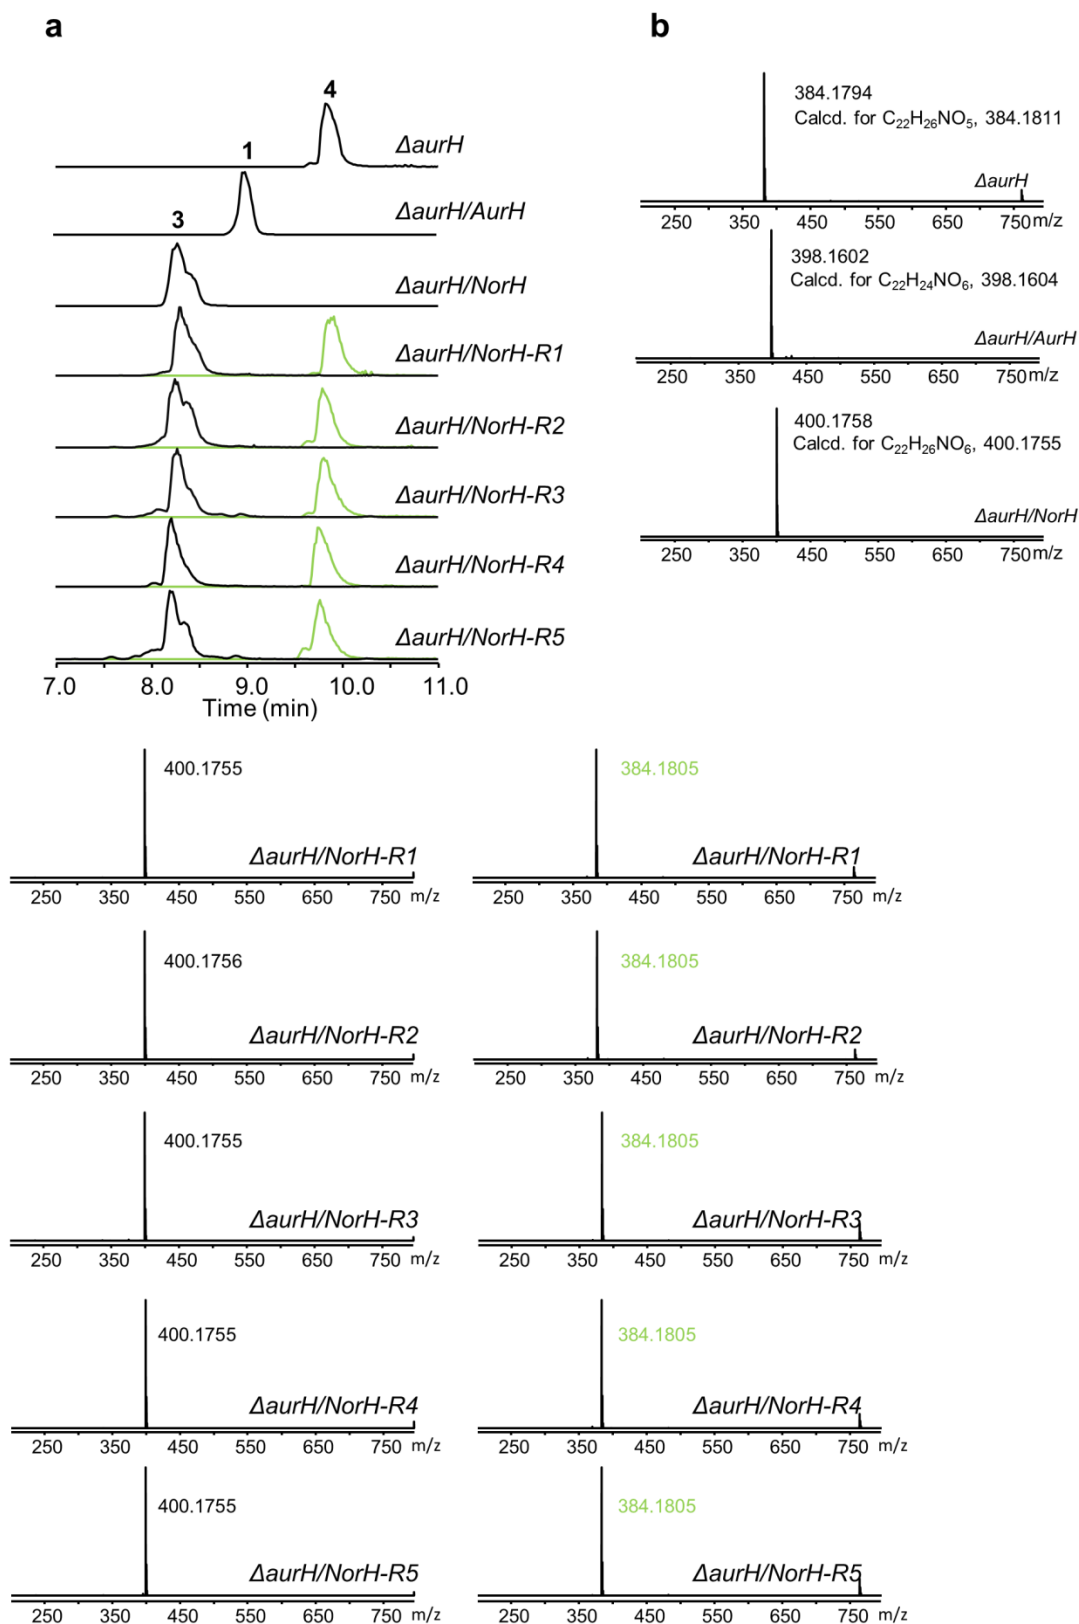

**Supplementary Figure 15. The HPLC-HRMS profiles of catalytic activities of region-swapped chimeric NorH variants at extracted ion chromatogram. a) The HPLC-HRMS profile at EIC  $m/z$  383.67-384.67 ( $M+H$ )<sup>+</sup> of authentic reference of 7-deoxyaureothin (4, yellowgreen),  $\Delta aurH/NorH-R1$ ,  $\Delta aurH/NorH-R2$ ,  $\Delta aurH/NorH-R3$ ,  $\Delta aurH/NorH-R4$ , and  $\Delta aurH/NorH-R5$ , EIC  $m/z$  397.65-398.65 ( $M+H$ )<sup>+</sup> of authentic reference of aureothin (1), EIC**



$m/z$  399.67-400.67 (M+H)<sup>+</sup> of authentic reference of 7-OH-deoxyaureothin (**3**),  $\Delta aurH/NorH$ -R1, (v)  $\Delta aurH/NorH$ -R2,  $\Delta aurH/NorH$ -R3,  $\Delta aurH/NorH$ -R4, and  $\Delta aurH/NorH$ -R5. **b**) Observed ions corresponding to those of **a**.

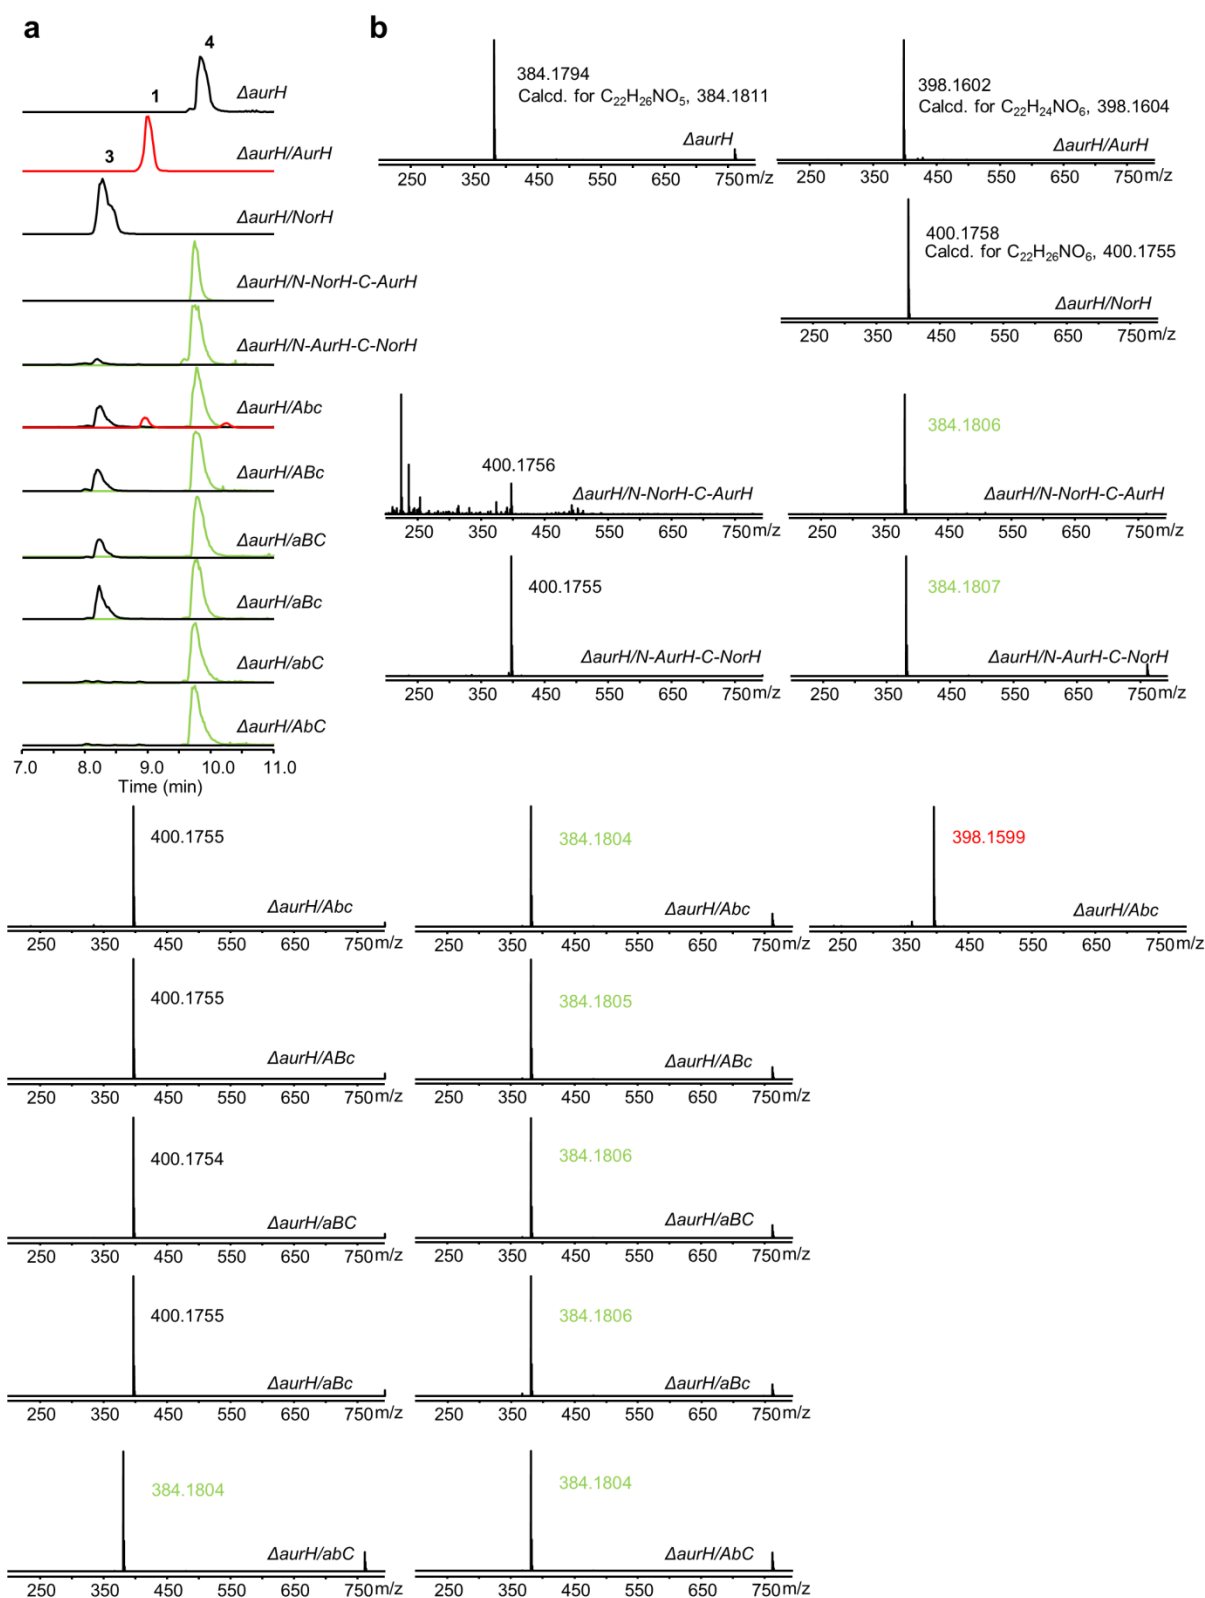

**Supplementary Figure 16. The HPLC-HRMS profiles of catalytic activities of hybrid NorH variants at extracted ion chromatogram.** a) The HPLC-HRMS profile at EIC  $m/z$  383.67-384.67 ( $M+H$ )<sup>+</sup> of authentic reference of 7-deoxyaureothin (**4**, yellowgreen),  $\Delta aurH/N-NorH-C-AurH$ ,  $\Delta aurH/N-AurH-C-NorH$ ,  $\Delta aurH/Abc$ ,  $\Delta aurH/ABc$ , and  $\Delta aurH/aBC$ ,  $\Delta aurH/aBc$ ,  $\Delta aurH/abC$ , and  $\Delta aurH/AbC$ , EIC  $m/z$  397.65-398.65 ( $M+H$ )<sup>+</sup> of authentic reference of aureothin (**1**, red), and  $\Delta aurH/Abc$ , EIC  $m/z$  399.67-400.67 ( $M+H$ )<sup>+</sup> of authentic reference of

7-OH-deoxyaureothin (**3**),  $\Delta_{aurH}/N$ -NorH-C-AurH,  $\Delta_{aurH}/N$ -AurH-C-NorH,  $\Delta_{aurH}/Abc$ ,  $\Delta_{aurH}/ABc$ , and  $\Delta_{aurH}/aBC$ ,  $\Delta_{aurH}/aBc$ . **b)** Observed ions corresponding to those of **a**.

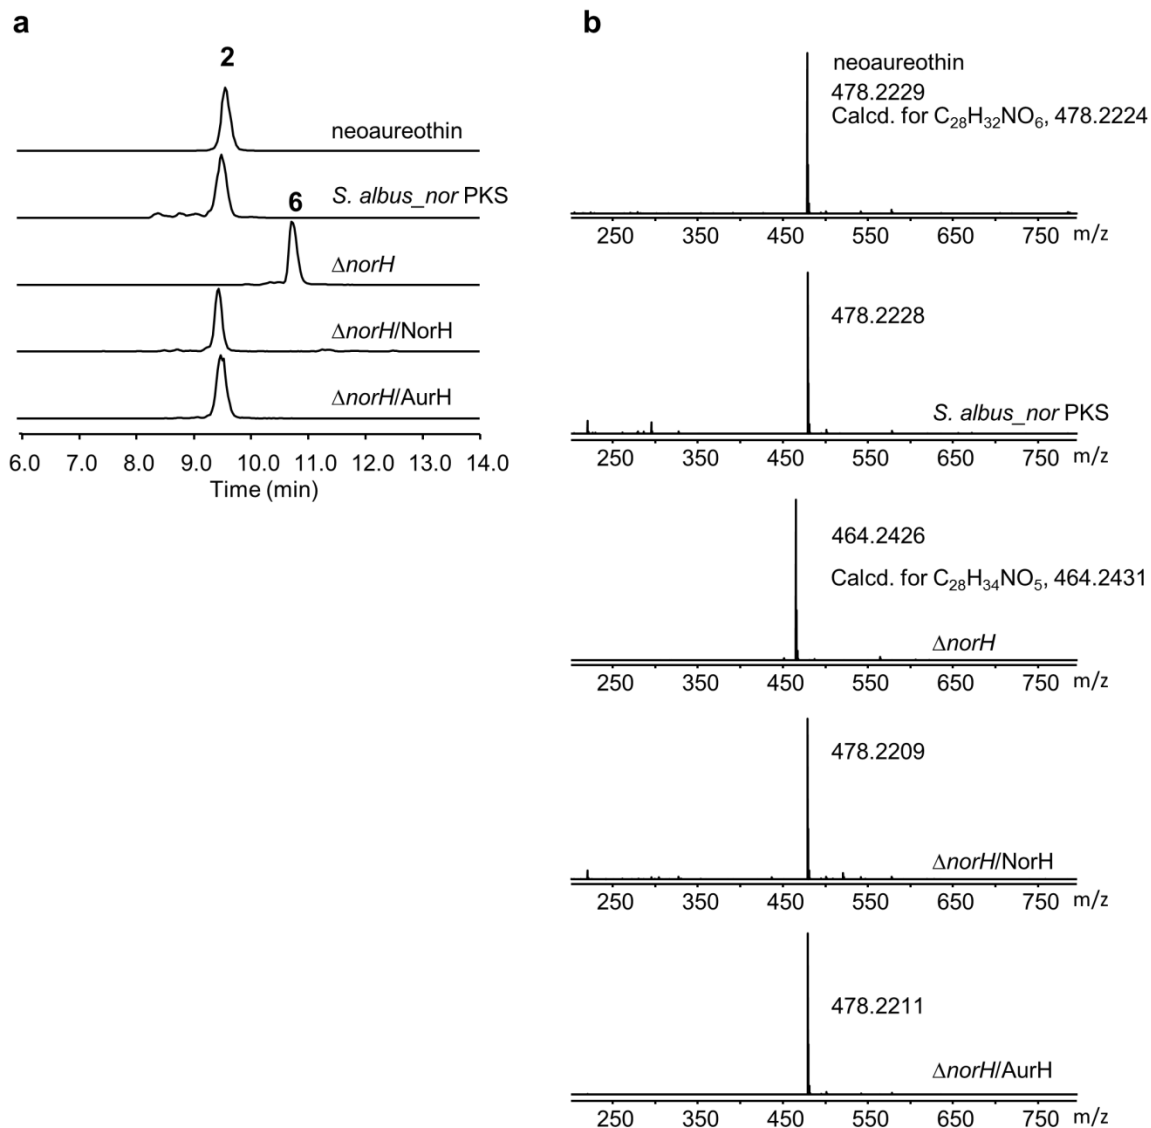

**Supplementary Figure 17. The HPLC-HRMS profiles of catalytic activities of NorH at extracted ion chromatogram.** a) The HPLC-HRMS profile at EIC  $m/z$  477.72–478.72 ( $M+H$ )<sup>+</sup> of authentic reference of neoareothin (**2**), and *S. albus\_nor* PKS,  $\Delta norH/norH$ ,  $\Delta norH/aurH$ , EIC  $m/z$  463.74–464.74 ( $M+H$ )<sup>+</sup> of *S. albus\_nor* PKS  $\Delta norH$ . Deoxyneoareothin (**6**). b) Observed ions corresponding to those of a).

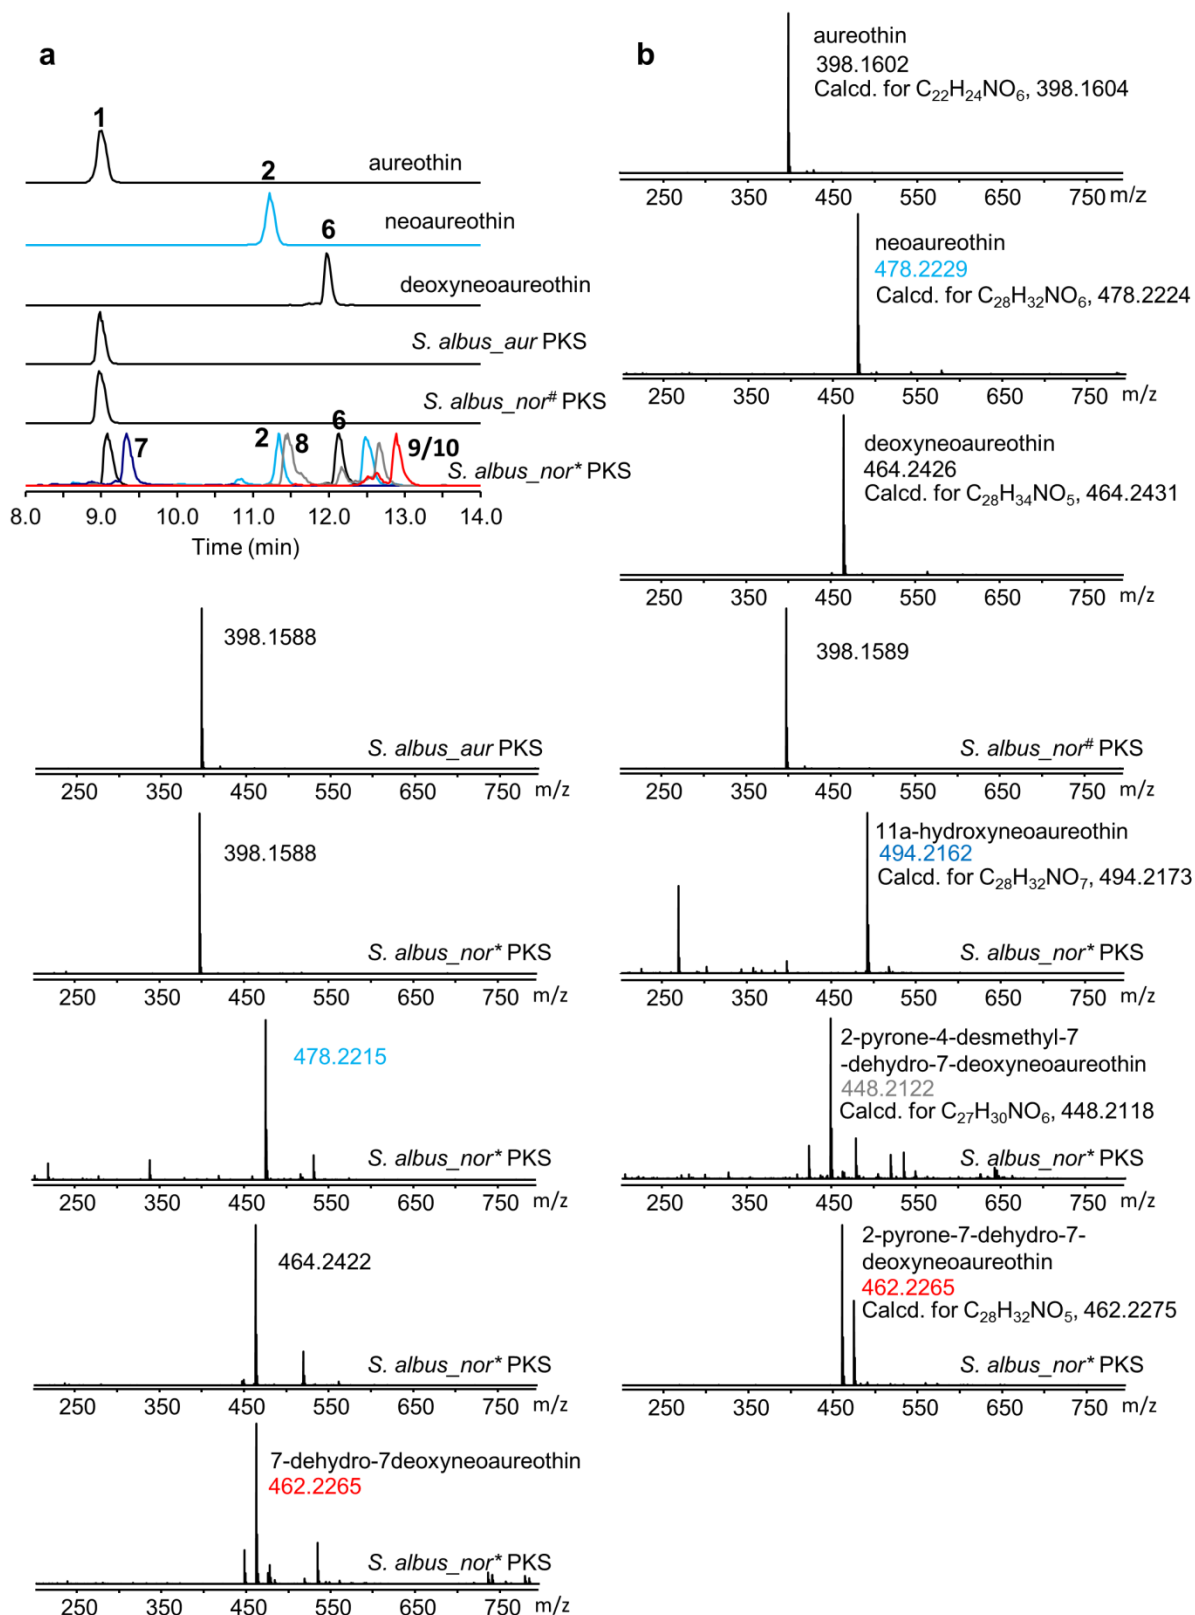

**Supplementary Figure 18. The HPLC-HRMS profiles of catalytic activities of NorH at extracted ion chromatogram. a),** The HPLC-HRMS profile at EIC  $m/z$  397.65–398.65 ( $M+H$ )<sup>+</sup> of authentic reference of aureothin (1), and *S. albus\_aur* PKS, *S. albus\_nor*<sup>#</sup> PKS, *S. albus\_nor*<sup>\*</sup> PKS, EIC  $m/z$  477.72–478.72 ( $M+H$ )<sup>+</sup> of authentic reference of neoareothin (2, skyblue) and *S. albus\_nor*<sup>\*</sup> PKS, EIC  $m/z$  463.73–464.73 ( $M+H$ )<sup>+</sup> of authentic reference of deoxyneoareothin (6) and *S. albus\_nor*<sup>\*</sup> PKS, EIC  $m/z$  493.71–494.71 ( $M+H$ )<sup>+</sup>, 11a-hydroxyneoareothin (7, navy), of *S. albus\_nor*<sup>\*</sup> PKS, at EIC  $m/z$  447.70–448.70 ( $M+H$ )<sup>+</sup>, 2-

pyrone-4-desmethyl-7-dehydro-7-deoxyneoaureothin (**8**, grey), of *S. albus\_nor*\* PKS, EIC  $m/z$  461.72-462.72 (M+H)<sup>+</sup>, 2-pyrone-7-dehydro-7deoxyneoaureothin (**9**, red) and 7-dehydro-7deoxyneoaureothin (**10**, red) of *S. albus\_nor*\* PKS. **b**), Observed ions corresponding to those of **a**.



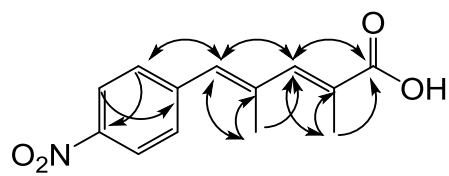

**Supplementary Figure 19. Structure and selected HMBC correlations of intermediate 5.** HMBC correlations are indicated by arrows.

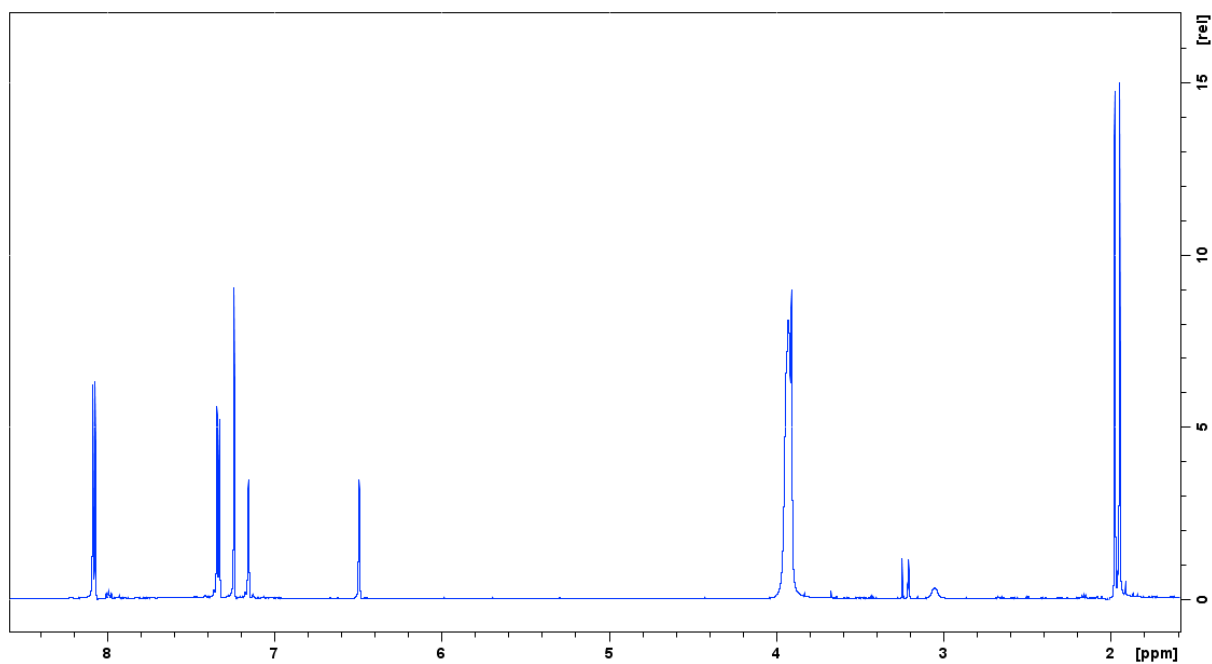

**Supplementary Figure 20.** <sup>1</sup>H NMR spectrum of intermediate 5. Solvent CDCl<sub>3</sub>/CD<sub>3</sub>OD (v/v 2:1).

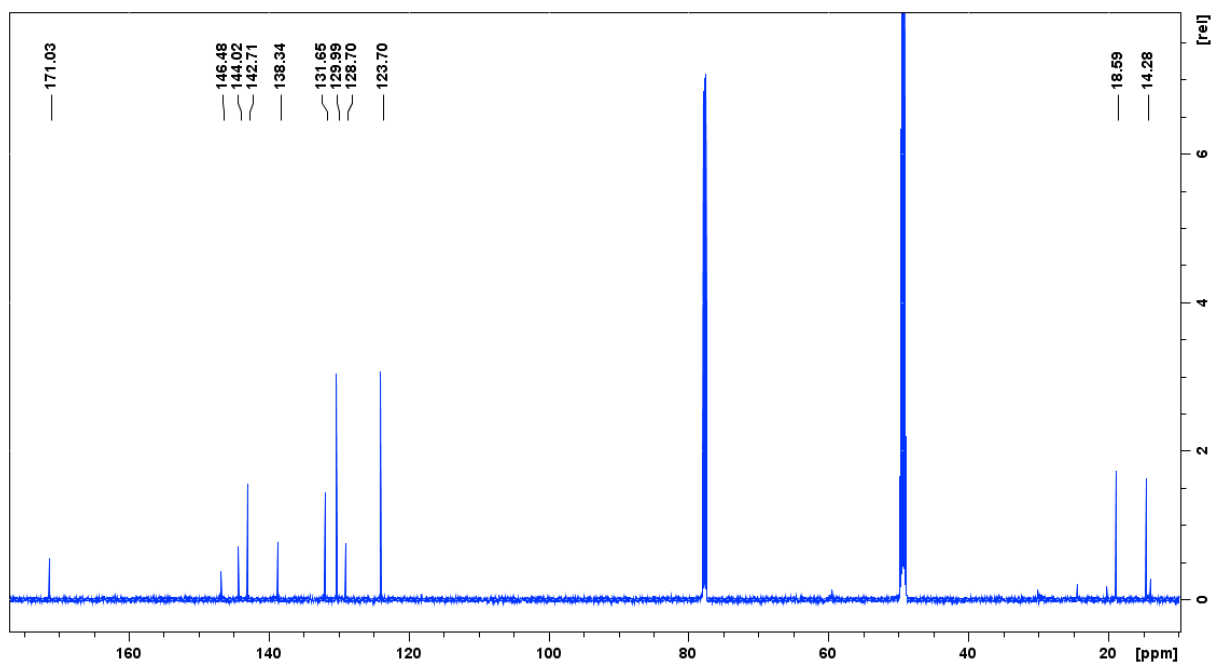

**Supplementary Figure 21.**  $^{13}\text{C}$  NMR spectrum of intermediate **5**. Solvent  $\text{CDCl}_3/\text{CD}_3\text{OD}$  (v/v 2:1).

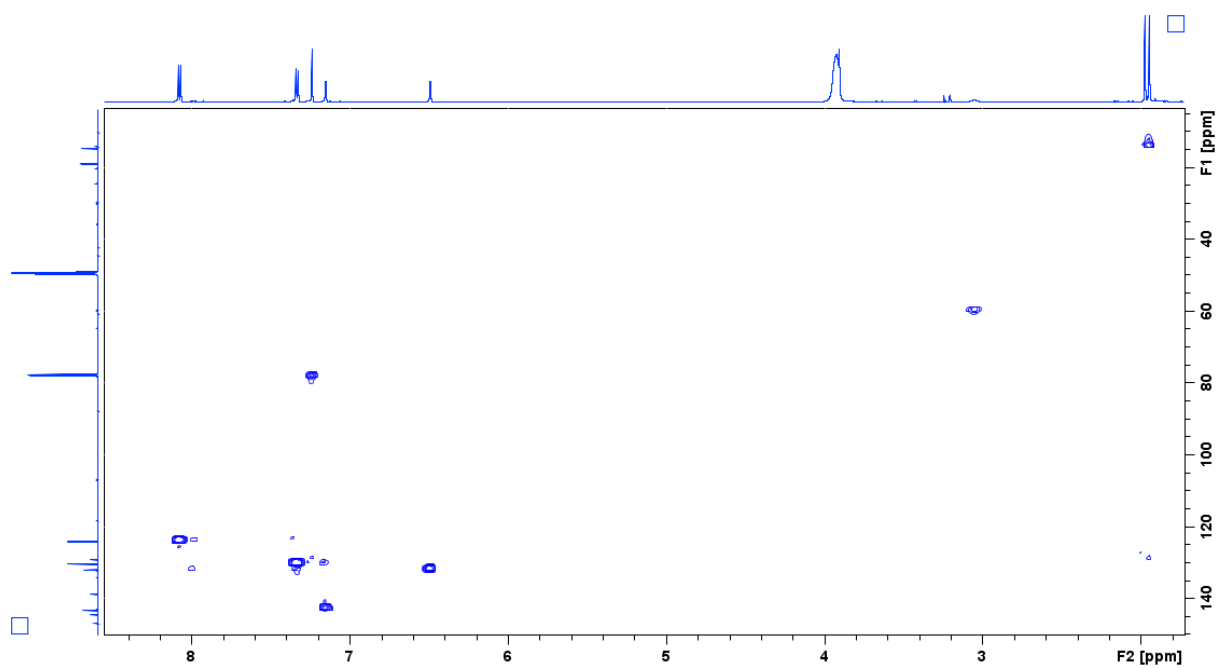

**Supplementary Figure 22.** HSQC spectrum of intermediate **5**. Solvent  $\text{CDCl}_3/\text{CD}_3\text{OD}$  (v/v 2:1).

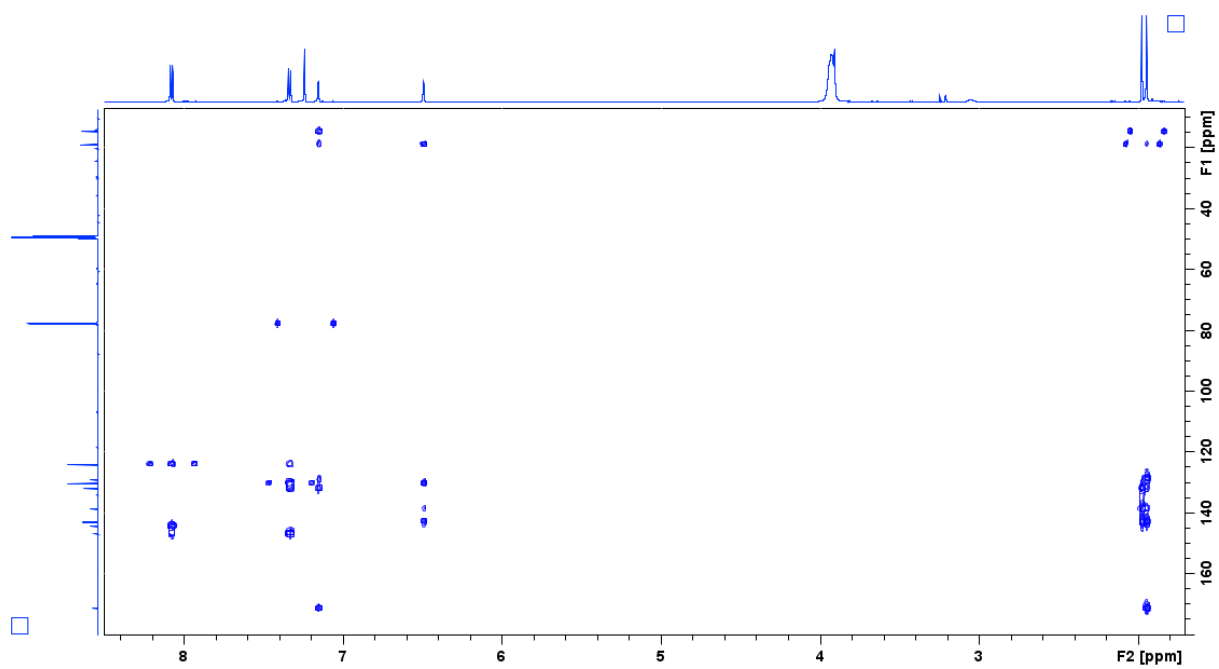

**Supplementary Figure 23. HMBC spectrum of intermediate 5. Solvent  $\text{CDCl}_3/\text{CD}_3\text{OD}$  (v/v 2:1).**

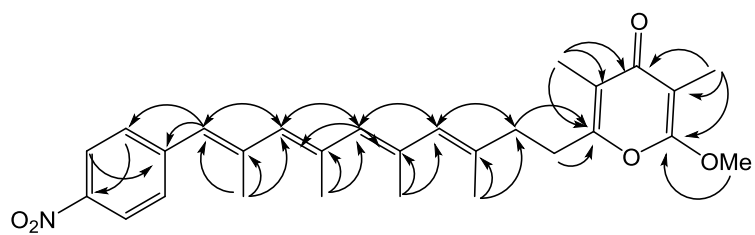

**Supplementary Figure 24. Structure and selected HMBC correlations of deoxyneoareothin.** HMBC correlations indicated by arrows, compound number 6.



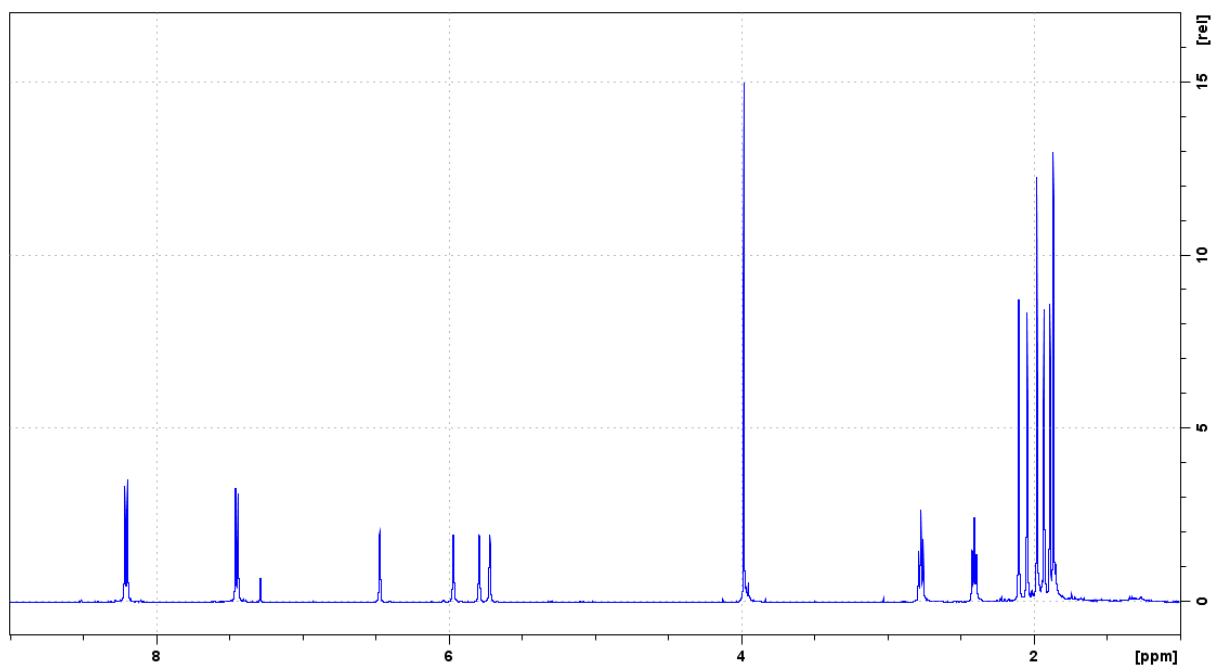

**Supplementary Figure 25. <sup>1</sup>H NMR spectrum of deoxyneoauereothin. Compound 6.**  
Solvent CDCl<sub>3</sub>.

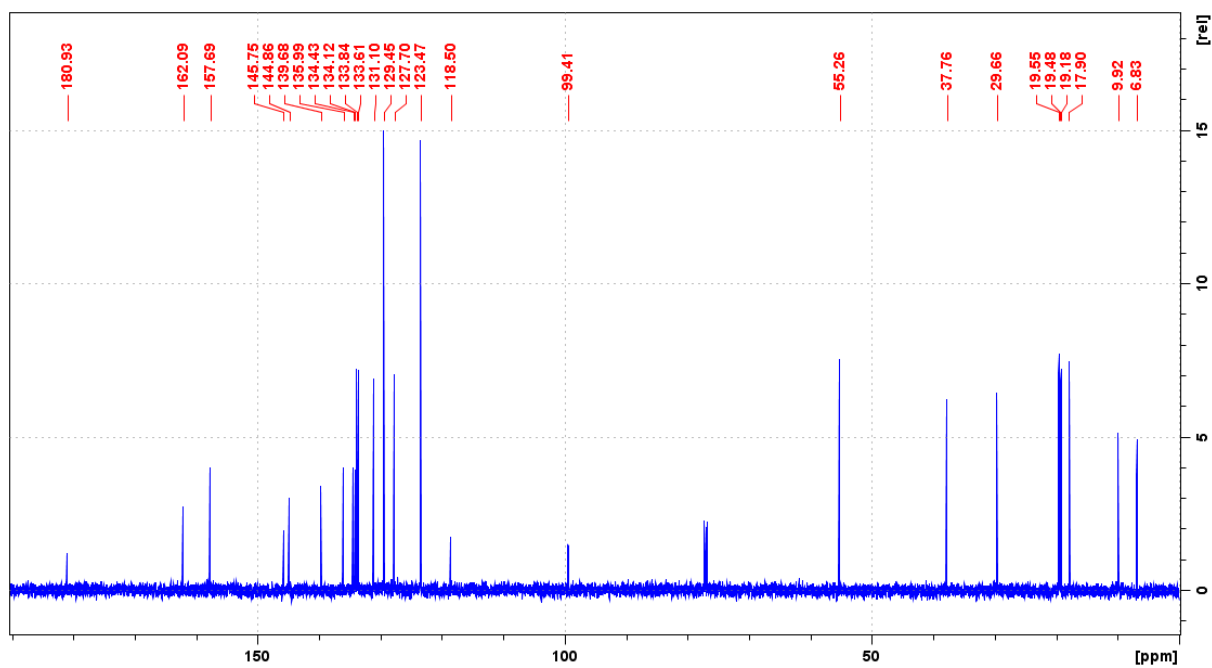

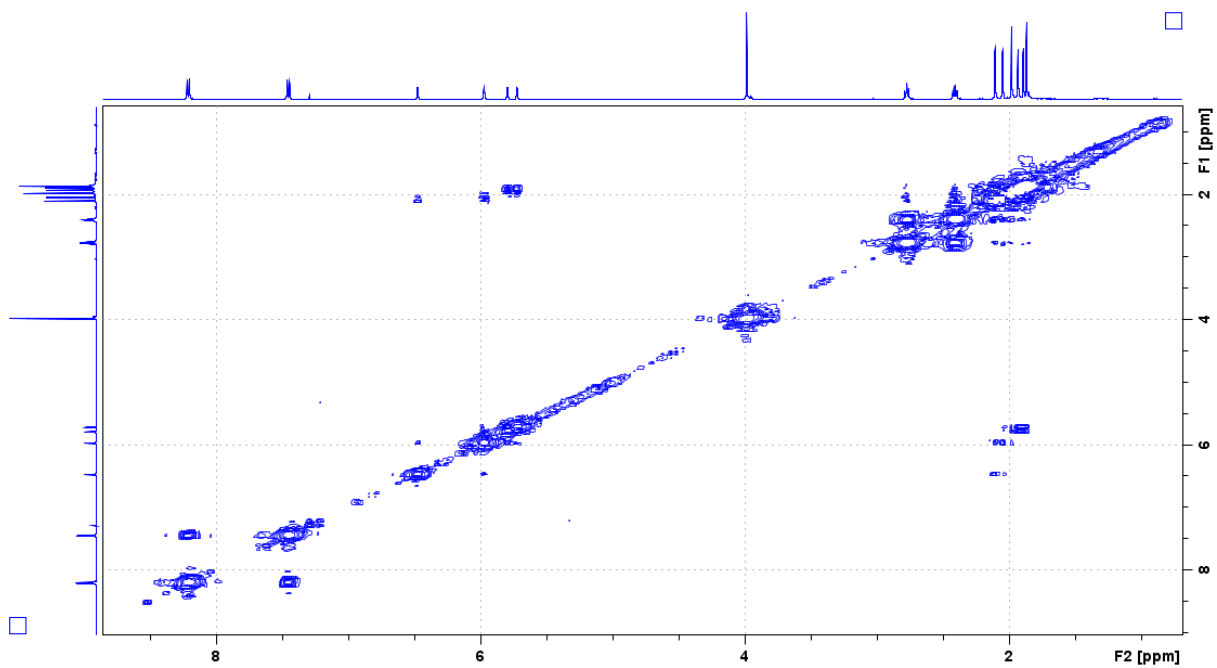

**Supplementary Figure 27.**  $^1\text{H}$ - $^1\text{H}$  COSY spectrum of deoxyneoareothin. Compound **6**. Solvent  $\text{CDCl}_3$ .

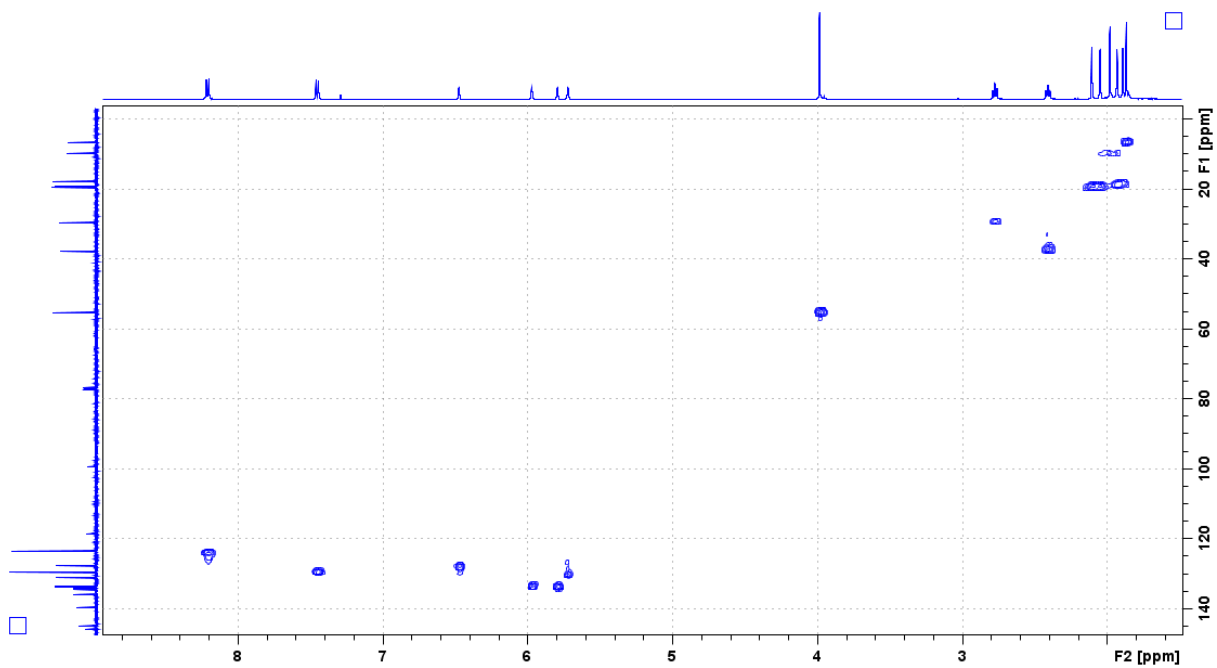

**Supplementary Figure 28. HSQC spectrum of deoxyneoareothin. Compound 6. Solvent  $\text{CDCl}_3$ .**

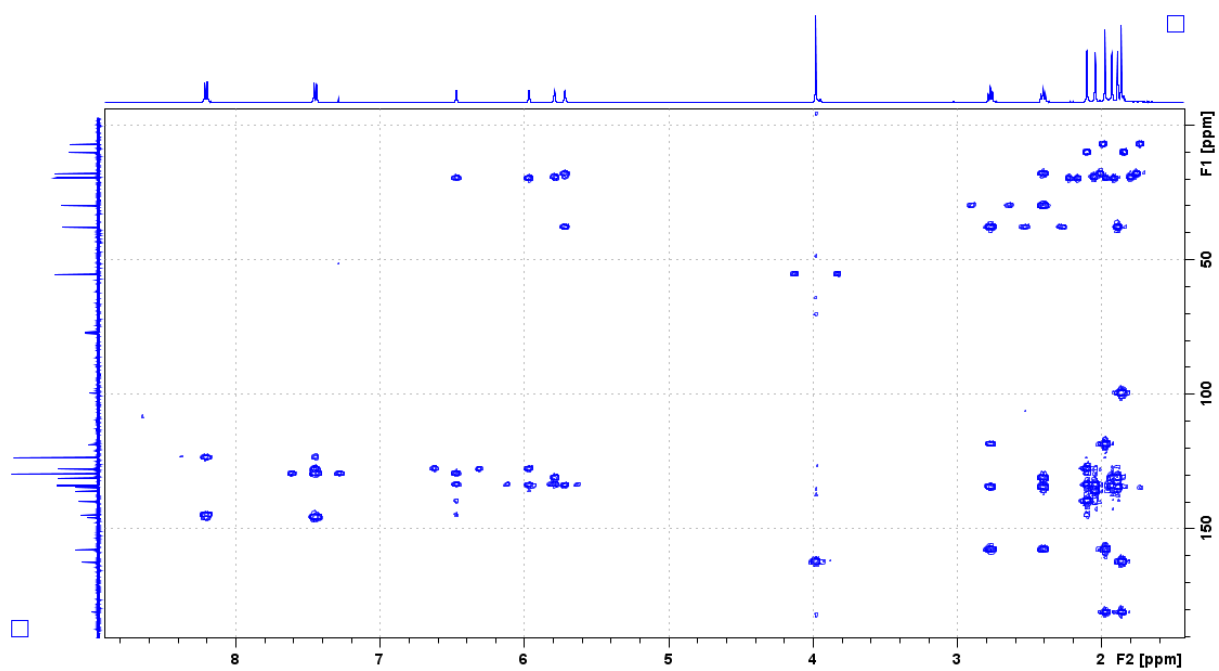

**Supplementary Figure 29. HMBC spectrum of deoxyneoareothin. Compound 6. Solvent  $\text{CDCl}_3$ .**

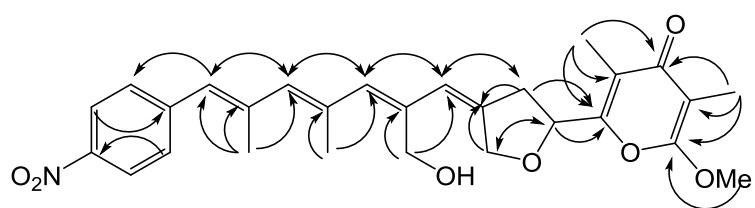

**Supplementary Figure 30. Selected HMBC correlations of 11a-hydroxyneoareothin.**  
Compound 7. HMBC correlations indicated by arrows.

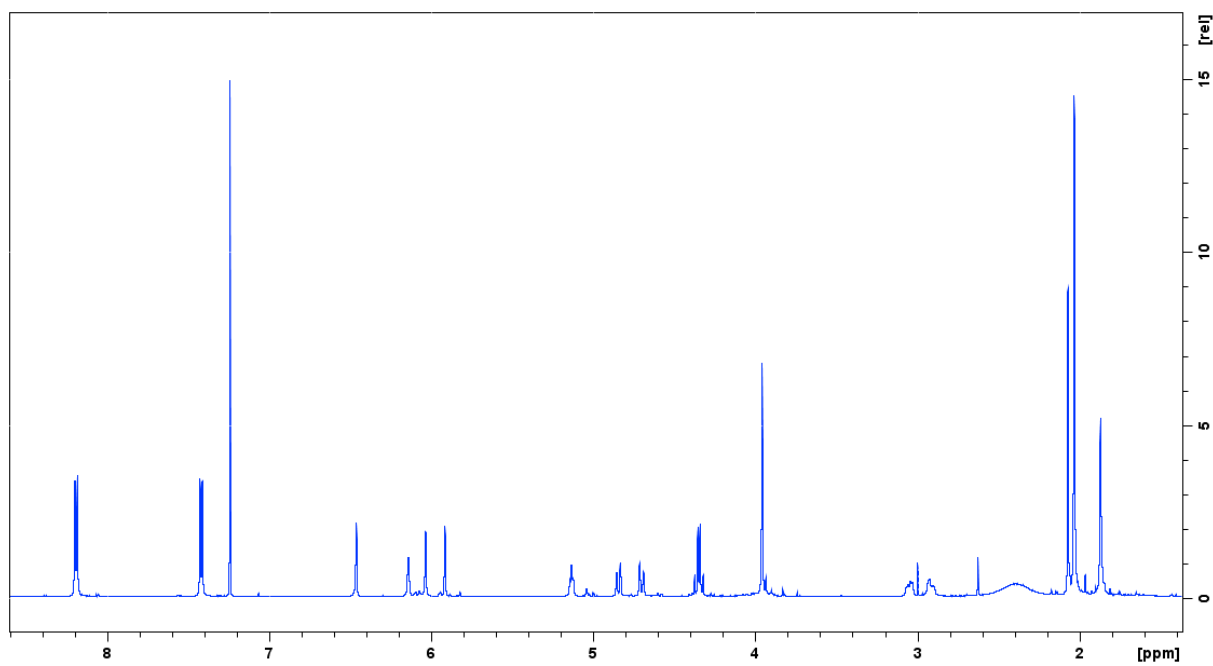

**Supplementary Figure 31.** <sup>1</sup>H NMR spectrum of 11a-hydroxyneoareothin. Compound 7. Solvent CDCl<sub>3</sub>.

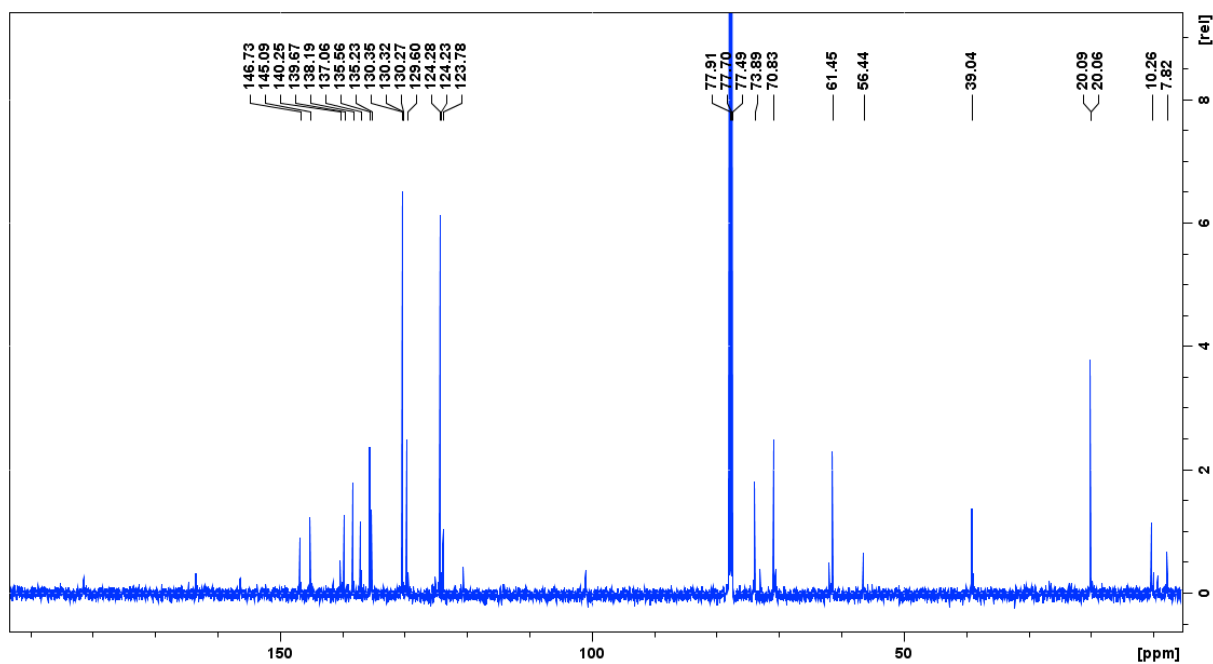

**Supplementary Figure 32.** <sup>13</sup>C NMR spectrum of 11a-hydroxyneoareothin. Compound 7. Solvent CDCl<sub>3</sub>.



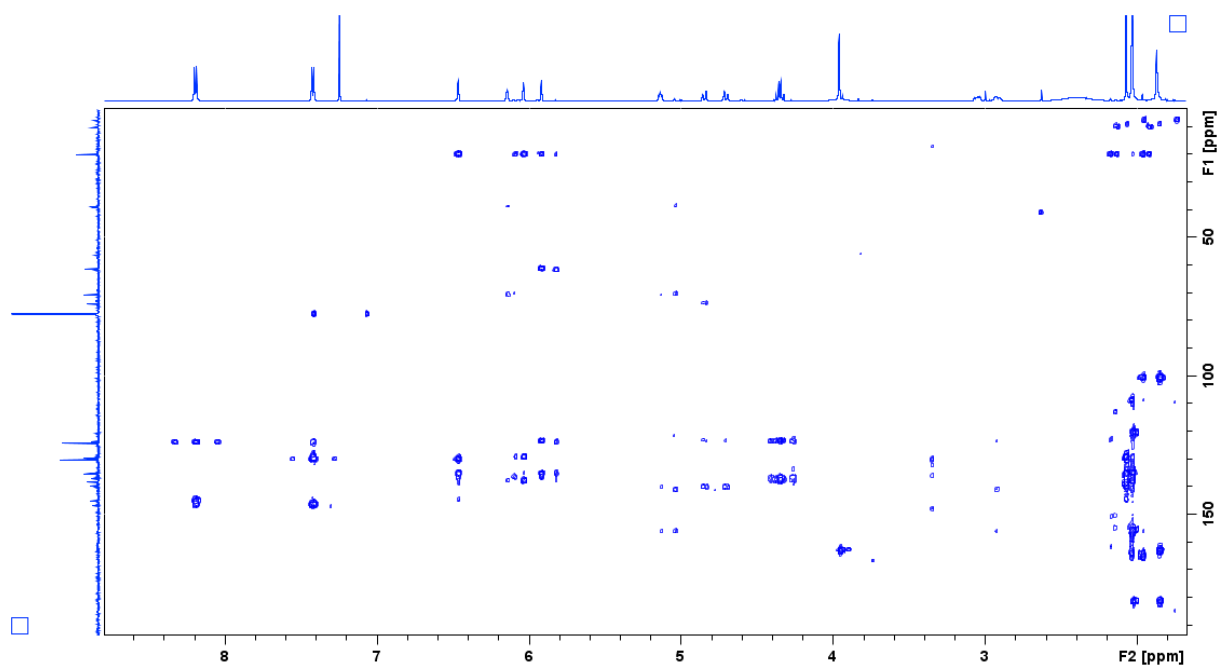

**Supplementary Figure 33. HMBC spectrum of 11a-hydroxyneoareothin. Compound 7.**  
Solvent  $\text{CDCl}_3$ .

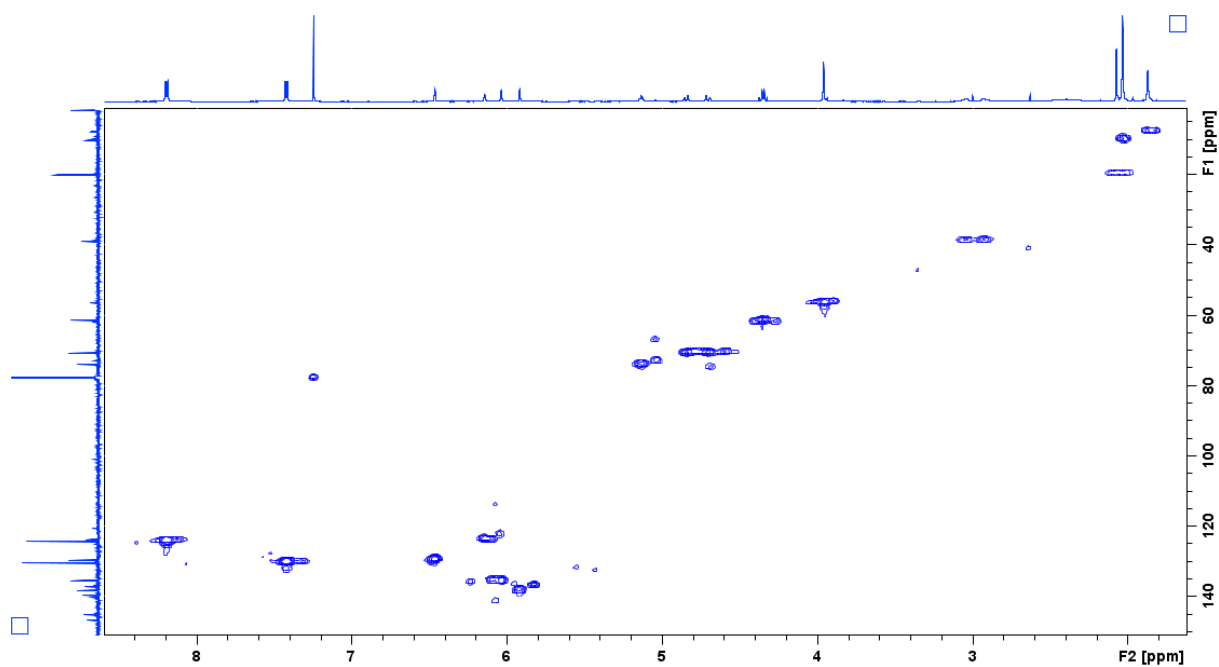

**Supplementary Figure 34.** HSQC spectrum of 11a-hydroxyneoauureothin. Compound 7. Solvent  $\text{CDCl}_3$ .

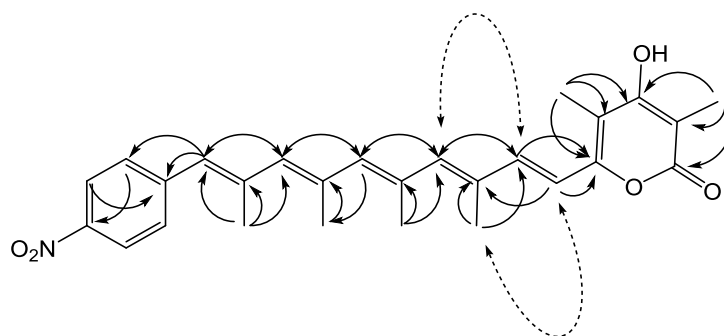

**Supplementary Figure 35. Structure and selected 2D NMR correlations of 2-pyrone-4a-desmethyl-7-dehydro-7-deoxyneoaureothin. Compound 8.** HMBC correlations are indicated by arrows, ROESY correlations by dashed arrows.

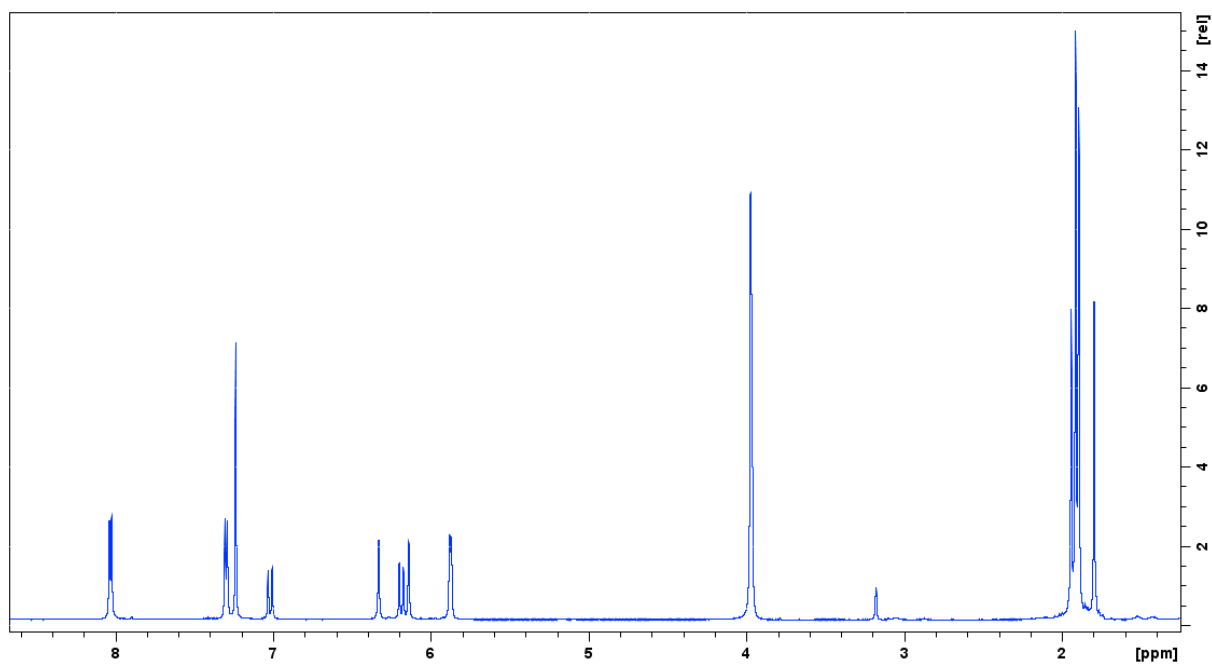

**Supplementary Figure 36.** <sup>1</sup>H NMR spectrum of 2-pyrone-4a-desmethyl-7-dehydro-7-deoxyneoareothin. Compound **8**. Solvent CDCl<sub>3</sub>/CD<sub>3</sub>OD.

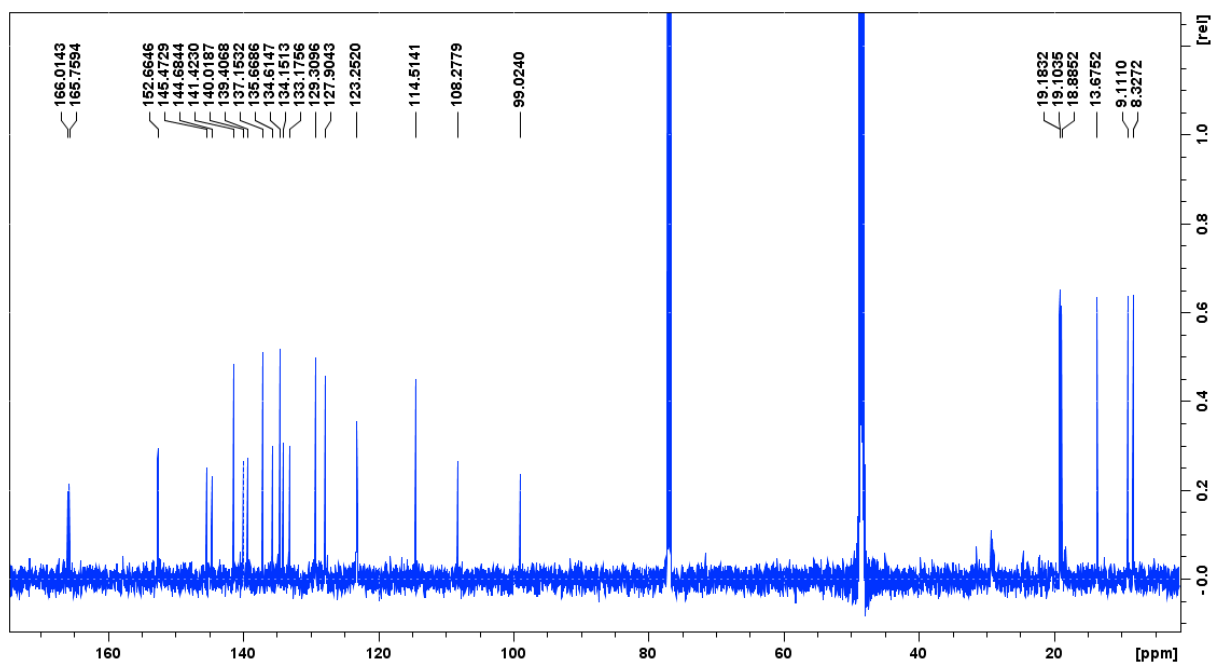

Supplementary Figure 37.  $^{13}\text{C}$  NMR spectrum of 2-pyrone-4a-desmethyl-7-dehydro-7-deoxyneoaureothin. Compound **8**. Solvent  $\text{CDCl}_3/\text{CD}_3\text{OD}$ .

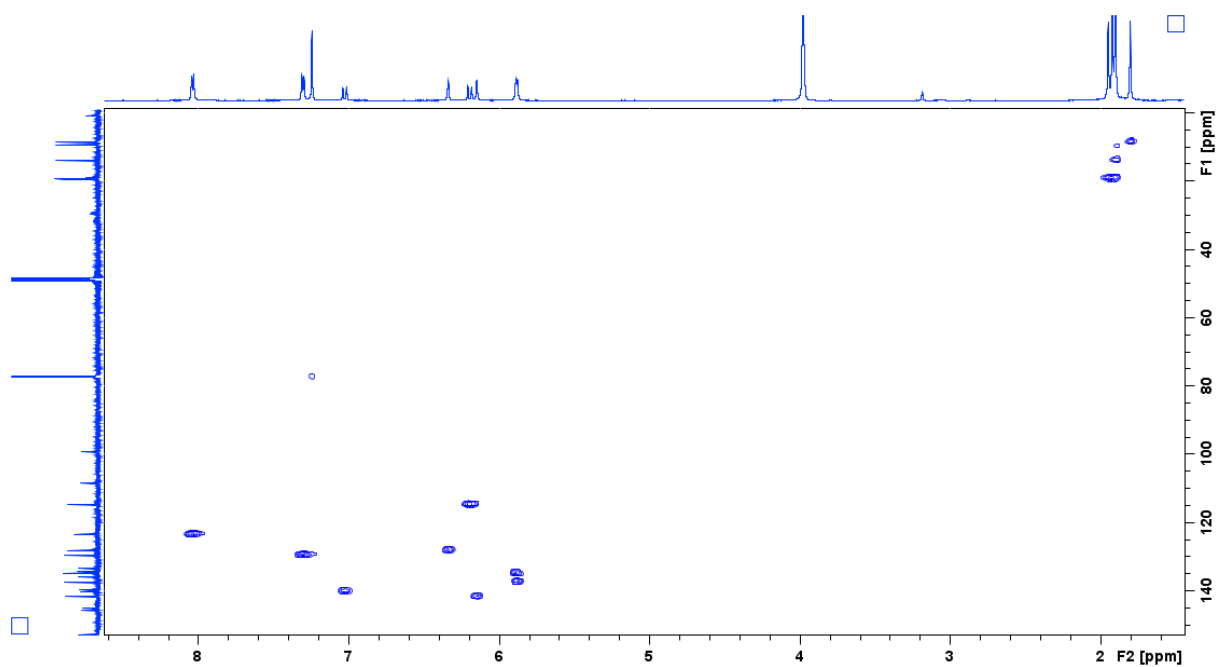

**Supplementary Figure 38. HSQC spectrum of 2-pyrone-4a-desmethyl-7-dehydro-7-deoxyneoaureothin. Compound 8. Solvent CDCl<sub>3</sub>/CD<sub>3</sub>OD.**

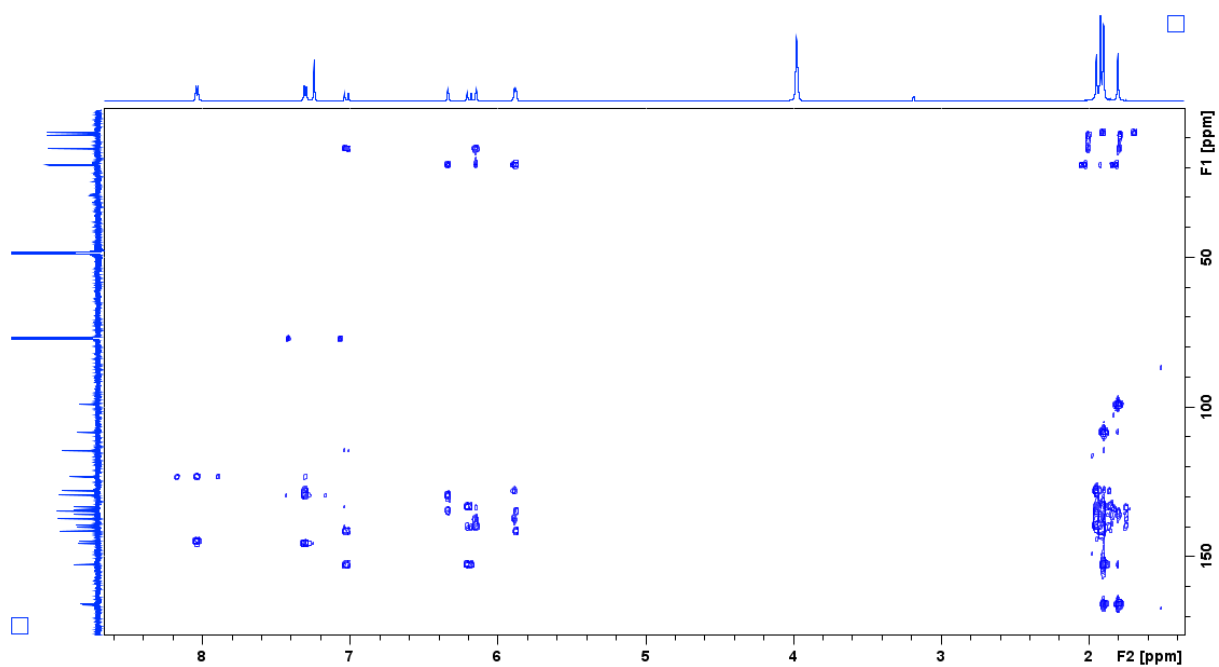

**Supplementary Figure 39.** HMBC spectrum of 2-pyrone-4a-desmethyl-7-dehydro-7-deoxyneoaureothin. Compound **8**. Solvent  $\text{CDCl}_3/\text{CD}_3\text{OD}$ .

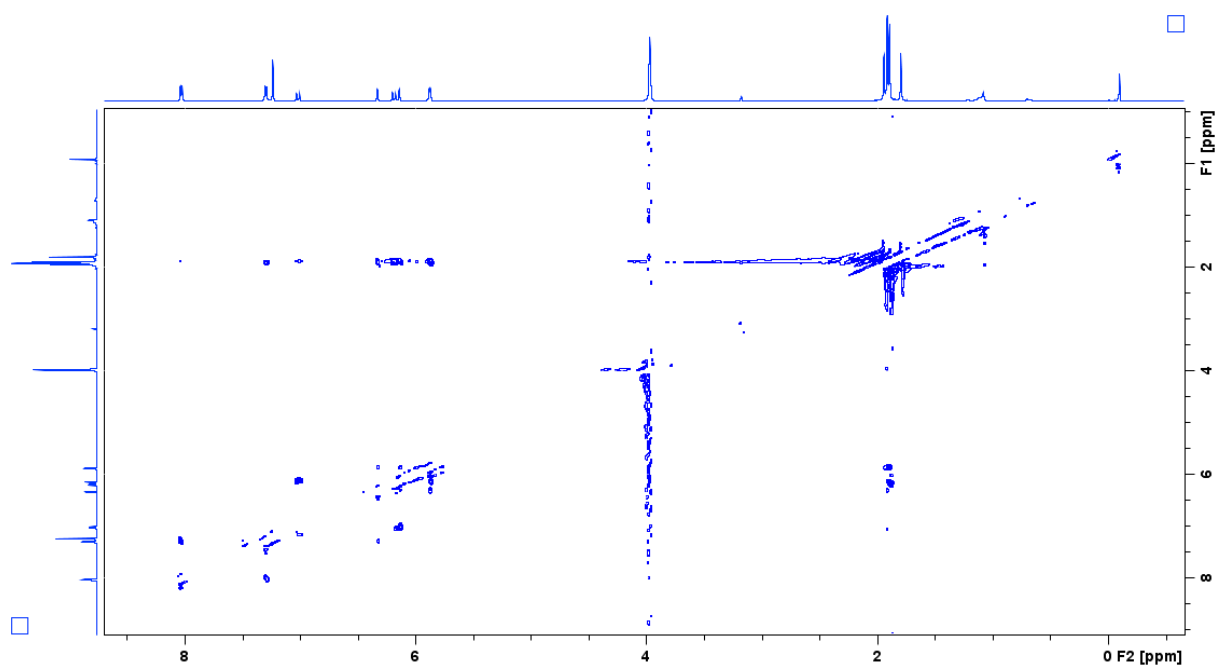

**Supplementary Figure 40. ROESY spectrum of 2-pyrone-4a-desmethyl-7-dehydro-7-deoxyneoaureothin. Compound 8. Solvent CDCl<sub>3</sub>/CD<sub>3</sub>OD.**



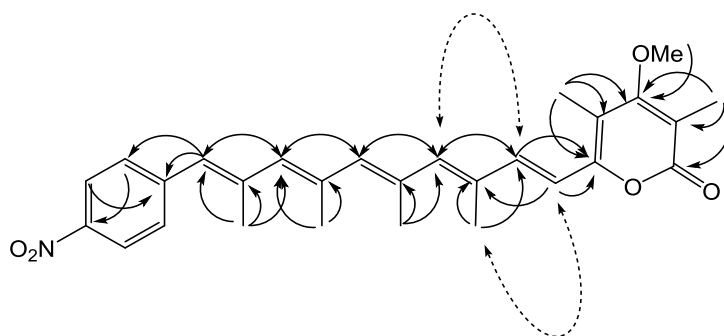

**Supplementary Figure 41. Structure and selected 2D NMR correlations of 2-pyrone-7-dehydro-7-depxyneoauriothin.** Compound **9**. HMBC correlations are indicated by arrows, ROESY correlations by dashed arrows.

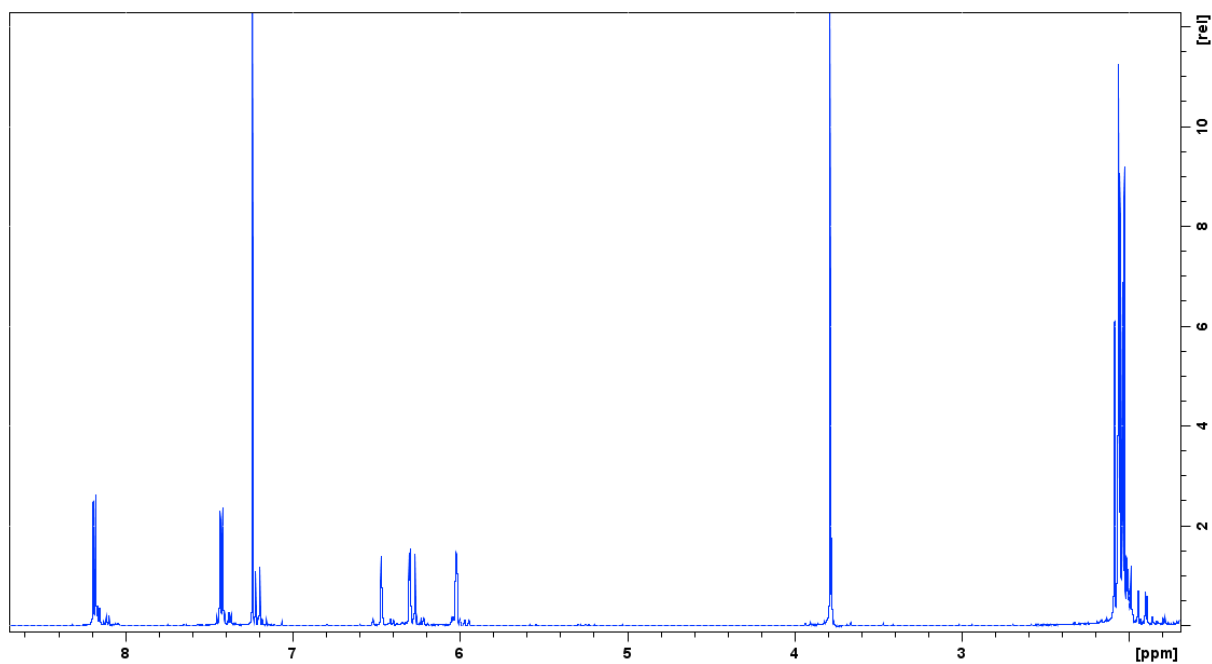

**Supplementary Figure 42.** <sup>1</sup>H NMR spectrum of 2-pyrone-7-dehydro-7-deoxyneoareothin. Compound **9**. Solvent CDCl<sub>3</sub>.

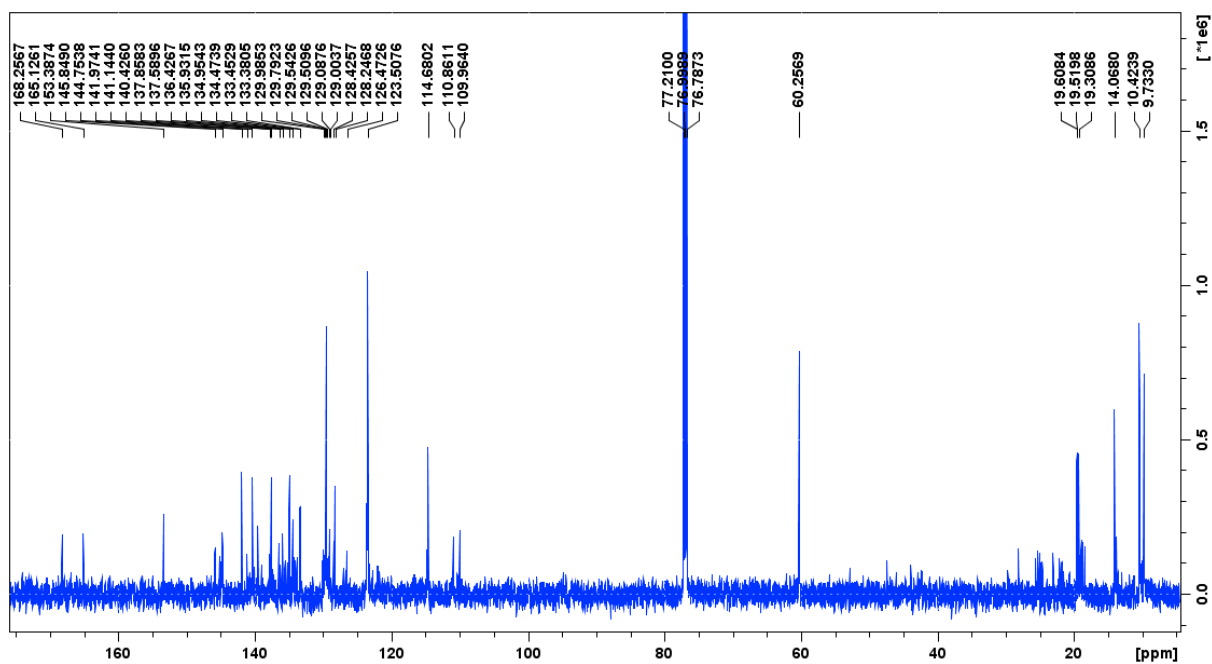

Supplementary Figure 43.  $^{13}\text{C}$  NMR spectrum of 2-pyrone-7-dehydro-7-deoxyneoareothin. Compound **9**. Solvent  $\text{CDCl}_3$ .

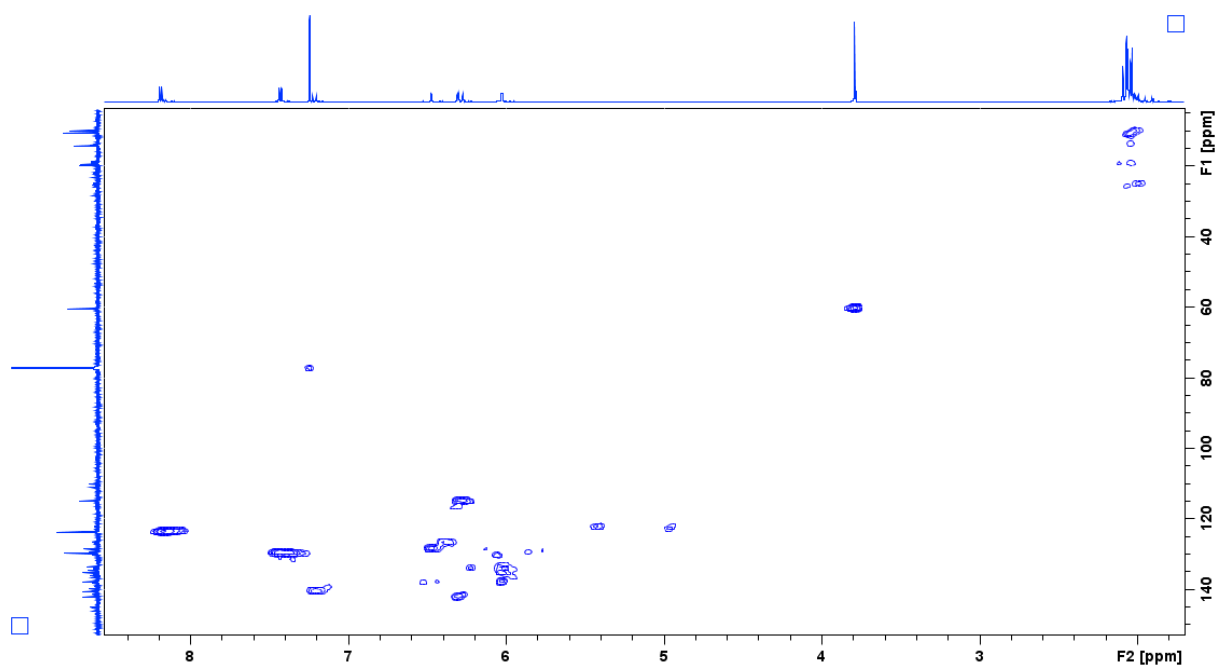

**Supplementary Figure 44.** HSQC spectrum of 2-pyrone-7-dehydro-7-deoxyneoareothin. Compound **9**. Solvent  $\text{CDCl}_3$ .

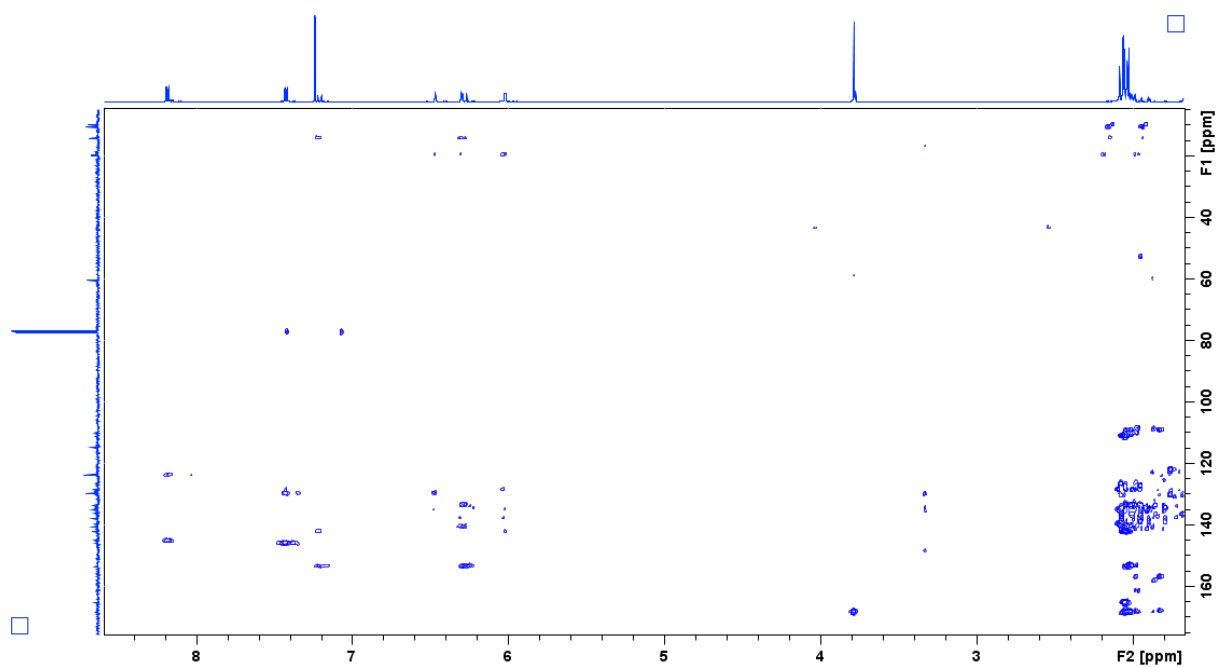

**Supplementary Figure 45. HMBC spectrum of 2-pyrone-7-dehydro-7-deoxyneoaureothin. Compound 9. Solvent  $\text{CDCl}_3$ .**

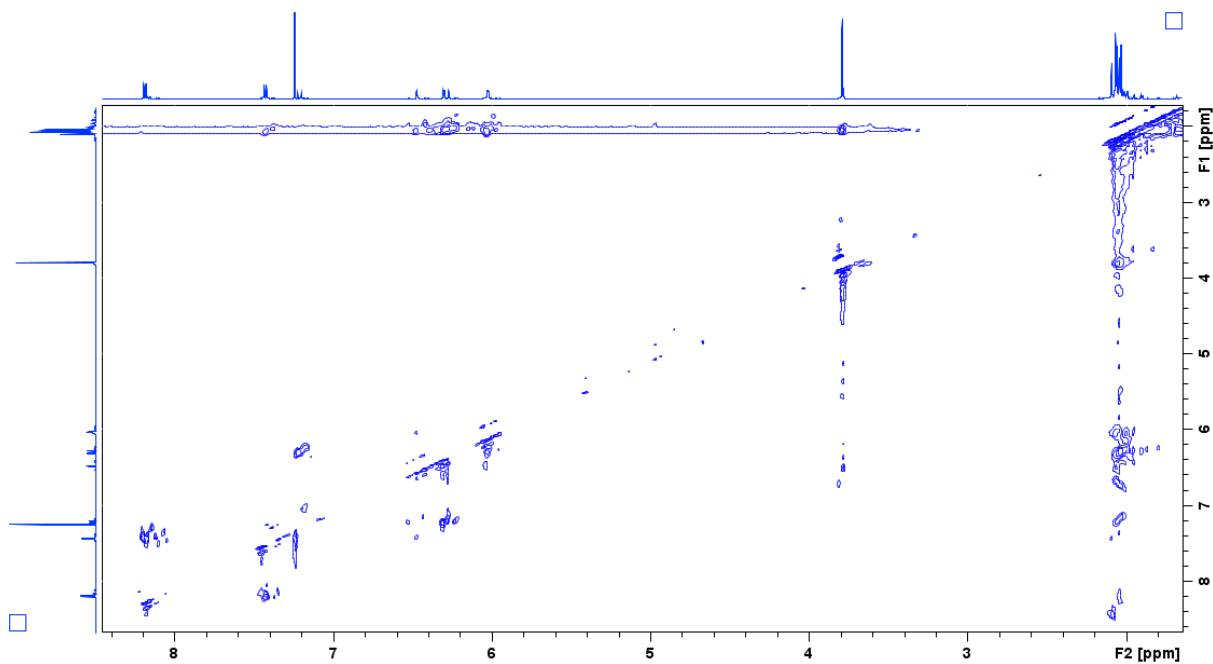

**Supplementary Figure 46. ROESY spectrum of 2-pyrone-7-dehydro-7-deoxyneoareothin. Compound 9. Solvent  $\text{CDCl}_3$ .**

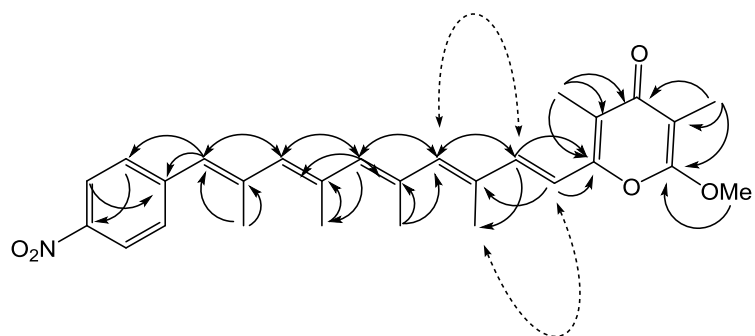

**Supplementary Figure 47. Structure and selected 2D NMR correlations. Compound 10.** HMBC correlations are indicated by arrows, ROESY correlations by dashed arrows.

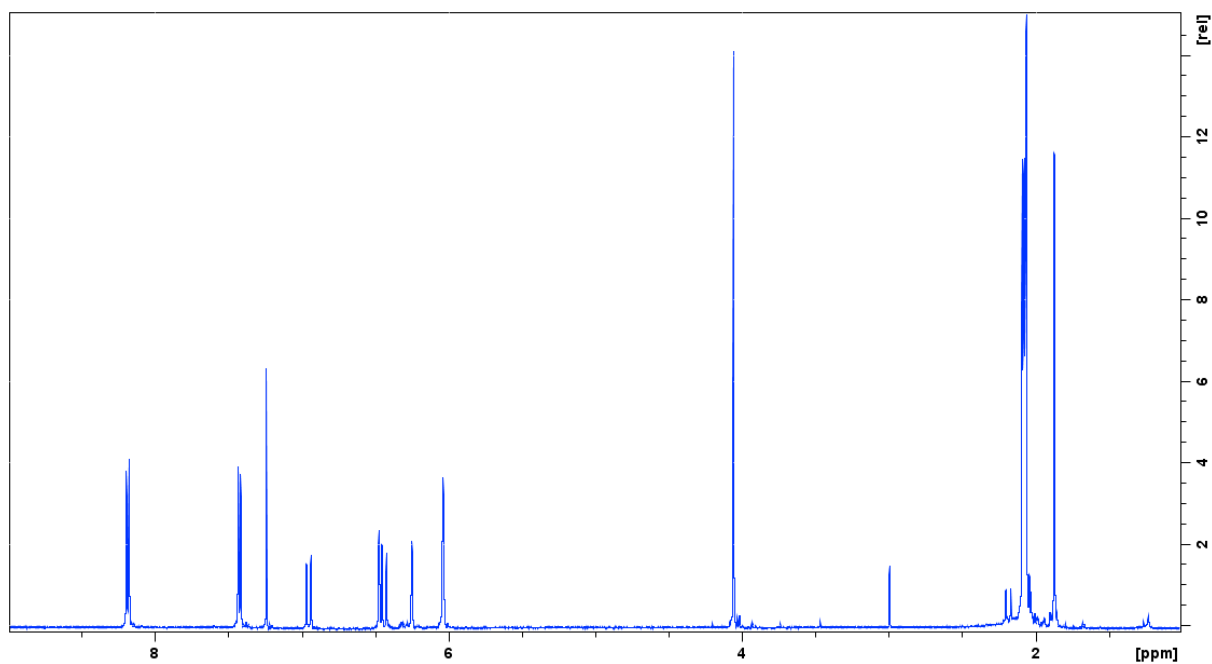

**Supplementary Figure 48.**  $^1\text{H}$  NMR spectrum of 7-dehydro-7-deoxyneoareothin. Compound **10**. Solvent  $\text{CDCl}_3$ .



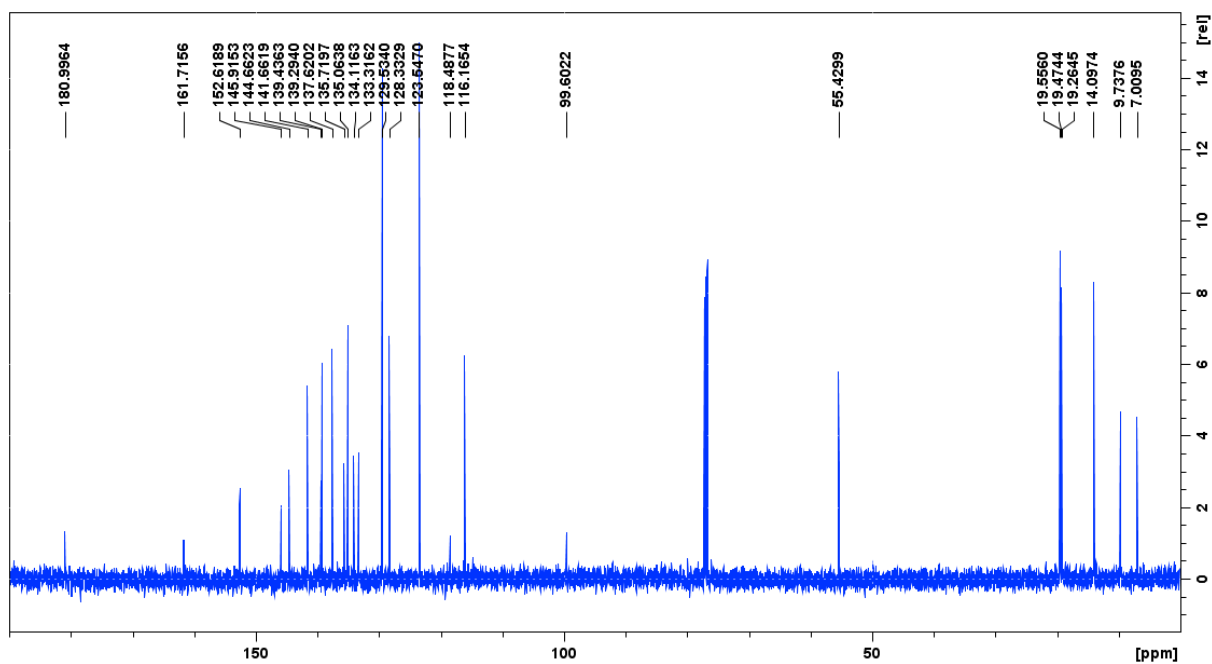

**Supplementary Figure 49.**  $^{13}\text{C}$  NMR spectrum of 7-dehydro-7-deoxyneoaureothin. Compound **10**. Solvent  $\text{CDCl}_3$ .

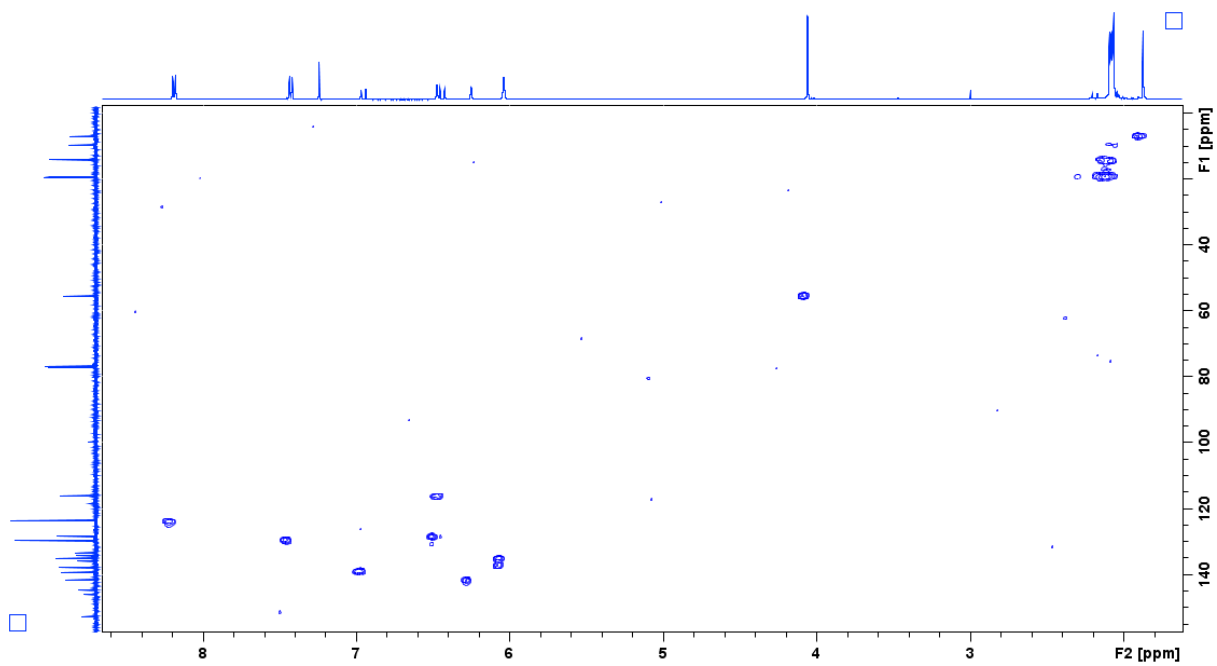

**Supplementary Figure 50. HSQC spectrum of 7-dehydro-7-deoxyneoaureothin.**  
Compound **10**. Solvent  $\text{CDCl}_3$ .

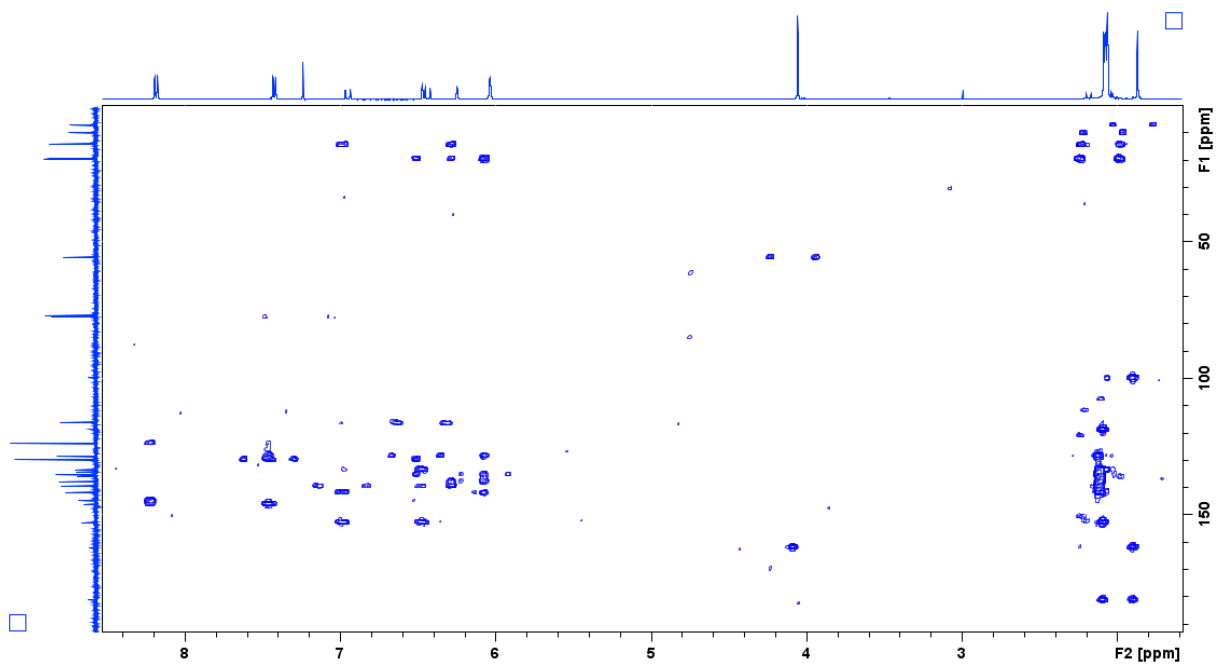

**Supplementary Figure 51. HMBC spectrum of 7-dehydro-7-deoxyneoareothin.**  
Compound **10**. Solvent  $\text{CDCl}_3$ .

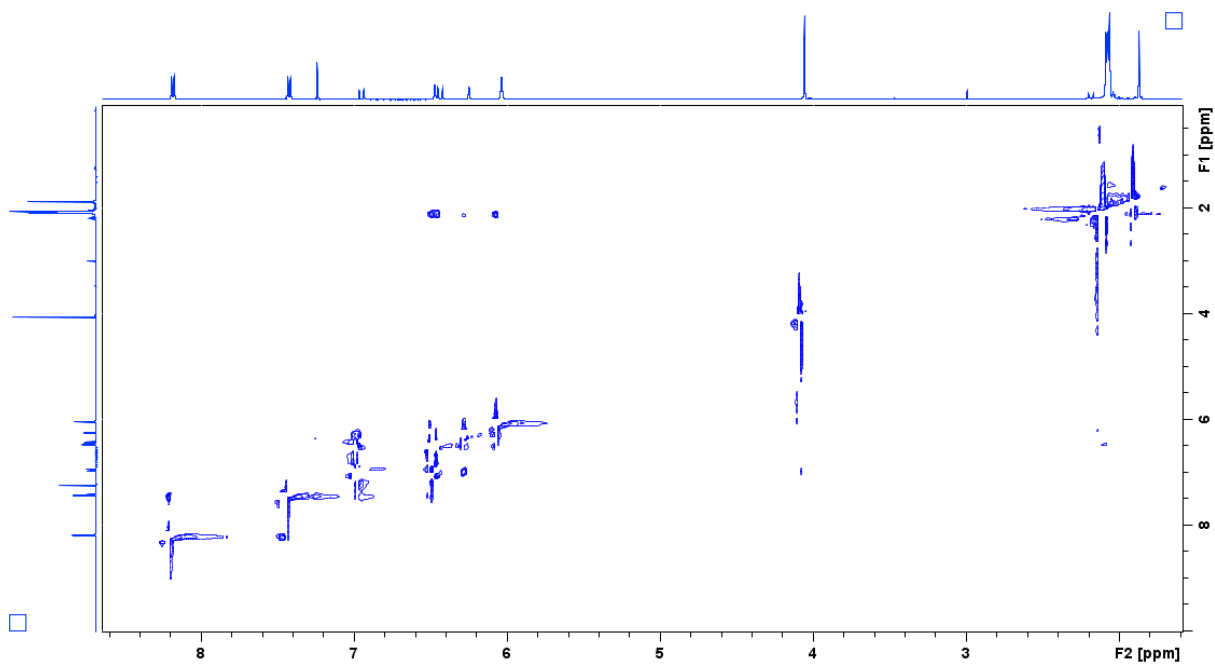

**Supplementary Figure 52.** ROESY spectrum of 7-dehydro-7-deoxyneoareothin. Compound **10**. Solvent  $\text{CDCl}_3$ .

**Supplementary Table 1. The *aur*- and *nor*-type gene clusters.**

|                 | <i>S. thioluteus</i> | <i>S. caatingaensis</i> | <i>S. scabrisporus</i><br>DSM41855 | <i>S. orinoci</i> | <i>S. alboflavus</i><br>MDJK44 | <i>S. alboflavus</i><br>B-2373 | <i>S. ruber</i> NRRL<br>ISP-5379<br>B-1661<br>ISP-5378 | <i>S. sp.</i> NRRL<br>B-1348<br>B-1347 |
|-----------------|----------------------|-------------------------|------------------------------------|-------------------|--------------------------------|--------------------------------|--------------------------------------------------------|----------------------------------------|
| <b>Aur/NorD</b> | CAE02599.1           | WP_078871048.1          | WP_079027019.1                     | CAO85889.1        | WP_087886696.1                 | WP_078619364.1                 | WP_078619364.1                                         | WP_078869010.2                         |
| <b>Aur/NorE</b> | CAE02600.1           | WP_049715219.1          | WP_020555942.1                     | CAO85890.1        | WP_087886697.1                 | WP_030357148.1                 | WP_030357148.1                                         | WP_018541096.2                         |
| <b>Aur/NorF</b> | CAE02601.1           | WP_049715218.1          | WP_020555941.1                     | CAO85891.1        | WP_087886698.1                 | WP_051811201.1                 | WP_051811201.1                                         | WP_030681451.2                         |
| <b>Aur/NorJ</b> | nf                   | nf                      | WP_020555940.1                     | CAO85892.1        | WP_087886699.1                 | WP_051811200.1                 | WP_051811200.1                                         | WP_078869021.2                         |
| <b>Aur/NorA</b> | CAE02602.1           | KNB53282                | WP_079027018.1                     | CAO85893.1        | WP_087886700.1                 | WP_051811199.1                 | WP_051811199.1                                         | WP_051855294                           |
| <b>Aur/NorG</b> | CAE02603.1           | WP_049715217.1          | WP_020555938.1                     | CAO85894.1        | WP_030357152.1                 | WP_030357152.1                 | WP_030357152.1                                         | WP_030681455.2                         |
| <b>Aur/NorK</b> | nf                   | nf                      | nf                                 | nf                | WP_087886701.1                 | WP_030357153.1                 | WP_030357153.1                                         | WP_030681457.2                         |
| <b>Aur/NorH</b> | CAE02604.1           | WP_049715216.1          | WP_063744948.1                     | CAO85895.1        | WP_087886702.1                 | WP_078619363.1                 | WP_078619363.1                                         | WP_078869011.2                         |
| <b>NorA'</b>    | nf                   | nf                      | WP_020555936.1                     | CAO85896.1        | WP_087886706.1                 | WP_051811198.1                 | WP_065914235                                           | WP_051855297.2                         |
| <b>Aur/NorB</b> | CAE02605.1           | WP_049715215.1          | nf                                 | CAO85897.1        | WP_087886707.1                 | WP_051811197.1                 | WP_051811197.1                                         | WP_030681465                           |
| <b>Aur/NorC</b> | CAE02606.1           | WP_053161065.1          | WP_052174042.1                     | CAO85898.1        | ARX88036.1                     | <b>Gap</b>                     | <b>Gap</b>                                             | WP_037826258                           |
| <b>Aur/NorI</b> | CAE02607.1           | WP_049715214.1          | WP_020555935.1                     | CAO85899.1        | WP_087887989.1                 | WP_030357158.1                 | WP_030357158.1                                         | WP_030681469.2                         |

**Supplementary Table 2. Proteins used for phylogenies.**

| <b>Polyketide</b>               | <b>Protein</b> | <b>Organism</b>                                                  | <b>Accession number</b> |
|---------------------------------|----------------|------------------------------------------------------------------|-------------------------|
| Avermectin <sup>21</sup>        | AveA1          | <i>Streptomyces avermitilis</i>                                  | Q9S0R8                  |
|                                 | AveA2          |                                                                  | Q9S0R7                  |
|                                 | AveA3          |                                                                  | Q9S0R4                  |
|                                 | AveA4          |                                                                  | Q9S0R3                  |
| Polyene macrolide <sup>22</sup> | PteA1          |                                                                  | Q93H87                  |
|                                 | PteA2          |                                                                  | Q93H86                  |
|                                 | PteA3          |                                                                  | Q93H85                  |
|                                 | PteA4          |                                                                  | Q93H84                  |
|                                 | PteA5          |                                                                  | Q93H83                  |
| Oligomycin <sup>22</sup>        | OlmA1          |                                                                  | Q93HJ5                  |
|                                 | OlmA2          |                                                                  | Q93HJ4                  |
|                                 | OlmA3          |                                                                  | Q93HJ3                  |
|                                 | OlmA4          |                                                                  | Q93HI8                  |
|                                 | OlmA5          |                                                                  | Q93HI9                  |
|                                 | OlmA6          |                                                                  | Q93HJ2                  |
|                                 | OlmA7          |                                                                  | Q93HJ1                  |
| Oleandomycin <sup>23</sup>      | OleA1          | <i>Streptomyces antibioticus</i>                                 | Q9KIV4                  |
|                                 | OleA11         |                                                                  | Q9KIV3                  |
| Niddamycin <sup>24</sup>        | NidA1          | <i>Streptomyces caelestis</i>                                    | O30764                  |
|                                 | NidA2          |                                                                  | O30765                  |
|                                 | NidA3          |                                                                  | O30766                  |
|                                 | NidA4          |                                                                  | O30767                  |
|                                 | NidA5          |                                                                  | O30768                  |
| Monensin <sup>13</sup>          | MonA1          | <i>Streptomyces cinnamonensis</i>                                | Q846X6                  |
|                                 | MonA11         |                                                                  | Q846X5                  |
|                                 | MonA111        |                                                                  | Q846X4                  |
|                                 | MonA1V         |                                                                  | Q846X3                  |
|                                 | MonAV          |                                                                  | Q846X2                  |
|                                 | MonAVI         |                                                                  | Q864X1                  |
|                                 | MonAVII        |                                                                  | Q846W5                  |
|                                 | MonAVIII       |                                                                  | Q846W6                  |
| Tylactone <sup>15</sup>         | TylG1          | <i>Streptomyces fradiae</i>                                      | O33954                  |
|                                 | TylG2          |                                                                  | O33955                  |
|                                 | TylG3          |                                                                  | O33956                  |
|                                 | TylG4          |                                                                  | O33957                  |
|                                 | TylG5          |                                                                  | O33958                  |
| FK520 <sup>25</sup>             | FkbA           | <i>Streptomyces hygroscopicus</i><br>subsp. <i>ascomyceticus</i> | P95814                  |
|                                 | FkbB           |                                                                  | Q9ZGA4                  |
|                                 | FkbC           |                                                                  | Q9KIE1                  |
| Rapamycin <sup>26</sup>         | RapA           | <i>Streptomyces hygroscopicus</i>                                | Q54297                  |
|                                 | RapB           |                                                                  | Q54296                  |
|                                 | RapC           |                                                                  | Q54299                  |
| Nanchangmycin <sup>27</sup>     | NanA1          | <i>Streptomyces nanchangensis</i>                                | Q7WTF5                  |
|                                 | NanA2          |                                                                  | Q7WTF4                  |
|                                 | NanA3          |                                                                  | Q7WTF3                  |
|                                 | NanA4          |                                                                  | Q7WTF2                  |
|                                 | NanA5          |                                                                  | Q7WTF1                  |
|                                 | NanA6          |                                                                  | Q7WTF0                  |
|                                 | NanA7          |                                                                  | Q7WTE3                  |
|                                 | NanA8          |                                                                  | Q7WTD6                  |
|                                 | NanA11         |                                                                  | Q7WTD7                  |
| Pimaricin <sup>16</sup>         | PimS0          | <i>Streptomyces natalensis</i>                                   | Q9X992                  |
|                                 | PimS1          |                                                                  | Q9X993                  |

|                            |         |                                    |        |
|----------------------------|---------|------------------------------------|--------|
|                            | PimS2   |                                    | Q9EWA1 |
|                            | PimS3   |                                    | Q9EWA2 |
|                            | PimS4   |                                    | Q9EWA3 |
| Amphotericin <sup>28</sup> | AmphA   | <i>Streptomyces nodosus</i>        | Q93NW8 |
|                            | AmphB   |                                    | Q93NW7 |
|                            | AmphC   |                                    | Q93NW6 |
|                            | AmphI   |                                    | Q93NX9 |
|                            | AmphJ   |                                    | Q93NX8 |
|                            | AmphK   |                                    | Q93NX7 |
| Nystatin <sup>12</sup>     | NysA    | <i>Streptomyces noursei</i>        | Q9L4W5 |
|                            | NysB    |                                    | Q9L4W4 |
|                            | NysC    |                                    | Q9L4W3 |
|                            | NysI    |                                    | Q9L4X3 |
|                            | NysJ    |                                    | Q9L4X2 |
|                            | NysK    |                                    | Q9L4X1 |
| Candidicin <sup>29</sup>   | FscA    | <i>Streptomyces</i> str. FR-008    | Q9W5Q3 |
|                            | FscB    |                                    | Q6W5P9 |
|                            | FscC    |                                    | Q6W5Q0 |
|                            | FscD    |                                    | Q6W5P6 |
|                            | FscE    |                                    | Q6W5P7 |
|                            | FscF    |                                    | Q6W5P8 |
| Pikromycin <sup>9</sup>    | PikAI   | <i>Streptomyces venezuelae</i>     | Q9ZGI5 |
|                            | PikAII  |                                    | Q9ZGI4 |
|                            | PikAIII |                                    | Q9ZGI3 |
|                            | PikAIV  |                                    | Q9ZGI2 |
| Erythromycin <sup>8</sup>  | DEBS1   | <i>Saccharopolyspora erythraea</i> | Q5UNP6 |
|                            | DEBS2   |                                    | Q5UNP5 |
|                            | DEBS3   |                                    | Q5UNP4 |
| Spinosa <sup>14</sup>      | SpnA    | <i>Saccharopolyspora spinosa</i>   | Q9ALM6 |
|                            | SpnB    |                                    | Q9ALM5 |
|                            | SpnC    |                                    | Q9ALM4 |
|                            | SpnD    |                                    | Q9ALM3 |
|                            | SpnE    |                                    | Q9ALM2 |
| Rifamycin <sup>17</sup>    | RifA    | <i>Amycolatopsis mediterranei</i>  | O54666 |
|                            | RifB    |                                    | O52545 |
|                            | RifC    |                                    | O52790 |
|                            | RifD    |                                    | O54591 |
|                            | RifE    |                                    | O54593 |
| Mycinamicin <sup>30</sup>  | MycAI   | <i>Micromonospora griseorubida</i> | Q83WF0 |
|                            | MycAII  |                                    | Q83WE9 |
|                            | MycAIII |                                    | Q83WE8 |
|                            | MycAIV  |                                    | Q83WE7 |
|                            | MycAV   |                                    | Q83WE6 |
| Megalomicin <sup>31</sup>  | MegAI   | <i>Micromonospora megalomicea</i>  | Q9F830 |
|                            | MegAII  |                                    | Q9F829 |
|                            | MegAIII |                                    | Q9F828 |

**Supplementary Table 3. List of primers for site-directed mutagenesis of *norH*.**

| <b>Primers</b> | <b>Sequence (from 5' to 3', mutated sites are underlined)</b> |
|----------------|---------------------------------------------------------------|
| I19F-fw        | CTGGAC <u>I</u> TCATCTCGCCCGGCTTCGCCTGGGACTC                  |
| I19F-rv        | GCCGGGCGAGATGA <u>A</u> GTCCAGGAACGGCAGG                      |
| V71L-fw        | CGCGAT <u>C</u> TGGTGGACCTGGTCGGGCCGCC                        |
| V71L-rv        | GACCAGGTCCACCAG <u>A</u> TGCGGGAAGCCGGAGA                     |
| T291L-fw       | CCCACCCTCACCGTGGTGGCCACCAAGTCCG                               |
| T291L-rv       | GGCCACCACGGTGA <u>G</u> GGTGGGGGCCAG                          |
| T292P-fw       | ACCACC <u>C</u> CGTGGTGGCCACCAAGTCCGCC                        |
| T292P-rv       | GGTGGCCACCACGG <u>G</u> GGTGGTGGGGC                           |
| W317F-fw       | CCGGTCT <u>T</u> TCTGTGCGCCCACTCCGCCAGC                       |
| W317F-rv       | GTGGGCGCACAGAA <u>A</u> AGACCGGGGTGCCGG                       |
| T392L-fw       | CCGGAG <u>C</u> TCGGCGTCTCCGGCCCGGAC                          |
| T392L-rv       | GCCGGAGACGCCG <u>A</u> GCTCCGGGCGCCAG                         |



**Supplementary Table 4. Identities/positives of AurH and homologous amino acid sequences.**

|                                  | AurH-S.<br><i>thioluteus</i> | AurH-S.<br><i>caatingaensis</i> | NorH-S.<br><i>scabrisporus</i> | NorH-S.<br><i>orinoci</i> | NorH-<br><i>S. alboblavus</i><br>MDJK44 | NorH-<br><i>S. ruber</i><br>5378 | NorH-<br><i>S. sp.</i><br>B-1347 |
|----------------------------------|------------------------------|---------------------------------|--------------------------------|---------------------------|-----------------------------------------|----------------------------------|----------------------------------|
| AurH-S. <i>thioluteus</i>        | 100/100                      | 93/96                           | 63/74                          | 64/74                     | 63/75                                   | 64/75                            | 62/74                            |
| AurH-S. <i>caatingaensis</i>     | 93/96                        | 100/100                         | 65/75                          | 64/75                     | 64/75                                   | 64/75                            | 62/75                            |
| NorH-S. <i>scabrisporus</i>      | 63/74                        | 65/75                           | 100/100                        | 76/83                     | 89/92                                   | 89/93                            | 79/87                            |
| NorH-S. <i>orinoci</i>           | 64/74                        | 64/75                           | 76/83                          | 100/100                   | 79/85                                   | 79/84                            | 77/85                            |
| NorH-S. <i>alboblavus</i> MDJK44 | 63/75                        | 64/75                           | 89/92                          | 79/85                     | 100/100                                 | 99/99                            | 78/85                            |
| NorH-S. <i>ruber</i> 5378        | 64/75                        | 64/75                           | 89/93                          | 79/84                     | 99/99                                   | 100/100                          | 78/85                            |
| NorH-S. sp. B-1347               | 62/74                        | 62/75                           | 79/87                          | 77/85                     | 78/85                                   | 78/85                            | 100/100                          |

The identities and positives comparison of AurH, NorH and homologues encoded in genomes of *Streptomyces* species was constructed by protein BLAST in NCBI. As shown in Supplementary Table 4, AurH from *S. thioluteus* is highly similar to AurH from *S. caatingaensis*: 93% identities and 96% positives. The NorH homologues show a high similarity with each other. For example, NorH-S. *alboblavus* MDJK44 and NorH-S. *ruber* 5378 show 99% identities and 99% positives. The positives between AurH and NorH range from 74% to 75%, while the positives between NorH homologues range from 83% to 99%. This indicates that NorH homologues are more similar to each other than to AurH.

**Supplementary Table 5. List of primers for region-swapped chimeric *norH* variants.**

| <b>Primers</b> | <b>Sequence (from 5' to 3', mutated sites are underlined)</b> |
|----------------|---------------------------------------------------------------|
| AurH-R1-fw     | <u>GACCAACTGGCCCGCGACAAGCGGCTGATCTCCGGCTTCCGCGATGTGGT</u>     |
| AurH-R1-rv     | <u>GATCAGCCGCTTGTTCGCGGGCCAGTTGGTCTGCCTCGGCGTACCTCAGCA</u>    |
| AurH-R2-fw     | <u>GGCCTGGTCGACATGGTCGGGACCCCGGAGGGCATCGTCCGCGACTTTAT</u>     |
| AurH-R2-rv     | <u>GCCCTCCGGGGTCCCGACCATGTTCGACCAGGCCGCGGAAGCCGGAGACCA</u>    |
| AurH-R3-fw     | <u>CGGCTGTCCATCGAGACCAACCTCGGCCTGGCGCTCGGCGACCTCAGCCT</u>     |
| AurH-R3-rv     | <u>CAGGCCGAGGTTGGTCTCGATGGACAGCCGGCCGACGGTGGCCTGGTCCT</u>     |
| AurH-R4-fw     | <u>TCCAACGACCAGGACATCCTCGTCAAGGTGGAGGAGGCGCTGAGCGG</u>        |
| AurH-R4-rv     | <u>CTTGACGAGGATGTCCTGGTTCGTTGGAGAGCGCCGCCACCAGTTGG</u>        |
| AurH-R5-fw     | <u>CACGAGCTCGGCGTCGCCGGGCCGACGCCCTGCCACTGCGCTTCGGCGC</u>      |
| AurH-R5-rv     | <u>GGCGTCCGGCCCGGCGACGCCGAGCTCGTGGCGCCAGCTGATCTCCCGG</u>      |

**Supplementary Table 6. List of primers for hybrid *norH/aurH* variants.**

| <b>Primers</b> | <b>Sequence (from 5' to 3')</b>            |
|----------------|--------------------------------------------|
| N-NorH-fw      | GGGCTGCAGGAATTCAACTAGTGATTATCACCATGCGGTG   |
| N-NorH-rv      | CAGGGTGCGCAGTTCGTCCTCGTCCAGC               |
| C-AurH-fw      | CGAACTGCGCACCCCTGGTCGCCACCGTCC             |
| C-AurH-rv      | ATACTCTTCCTTTTTCAATTCAGGCCGCGCCGAAGCGCA    |
| N-AurH-fw      | GGGCTGCAGGAATTCAACTAGTTTCGGCGAACAGAATG     |
| N-AurH-rv      | CAGGGTGCGCAGCTCGTAGTCGTGAGG                |
| C-NorH-fw      | CGAGCTGCGCACCCCTGGTGGCCACCCCTG             |
| C-NorH-rv-1    | ATACTCTTCCTTTTTCAATTCAGGCCGCGCCGAAGCGCAGTG |
| NorH-A-rv      | CCAGGCCGCGCAGCCTGCGGTGGTC                  |
| AurH-b-fw      | GACCACCGCAGGCTGCGCGGCCTGG                  |

**Supplementary Table 7. Substrate recognition of AurH and NorH in relation to compound size.**

| Substrates and resulting structures |                                                                                   |                                                                                   |                                                                                    |                                                                                     |
|-------------------------------------|-----------------------------------------------------------------------------------|-----------------------------------------------------------------------------------|------------------------------------------------------------------------------------|-------------------------------------------------------------------------------------|
|                                     | deoxy-aureothin                                                                   | deoxy-homoaureothin                                                               | deoxy-neoaureothin                                                                 | deoxy-homoneoaureothin                                                              |
|                                     | 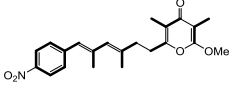 |  |  |  |
| AurH                                | THF ring                                                                          | -                                                                                 | THF ring                                                                           | THF ring                                                                            |
| NorH                                | C-7 oxidation                                                                     | THF ring                                                                          | THF ring                                                                           | THF ring                                                                            |

THF: tetrahydrofuran, -: unknown

**Supplementary Table 8. <sup>1</sup>H and <sup>13</sup>C NMR data for intermediate 5.**

| Position | <sup>1</sup> H (J <sub>Hz</sub> ) | <sup>13</sup> C (mult) | HMBC correlations (H to C) |
|----------|-----------------------------------|------------------------|----------------------------|
| 1        |                                   | 171.0 (s)              |                            |
| 2        |                                   | 128.7 (s)              |                            |
| 2a       | 1.95 (s)                          | 14.3 (q)               | C1, 2, 3                   |
| 3        | 7.15 (s)                          | 142.7 (d)              | C1, 2, 2a, 4, 4a, 5        |
| 4        |                                   | 138.3 (d)              |                            |
| 4a       | 1.98 (s)                          | 18.6 (q)               | C4, 5, 6                   |
| 5        | 6.49 (s)                          | 131.7 (d)              | C3, 4a, 6, 7, 11           |
| 6        |                                   | 144.0 (s)              |                            |
| 7,11     | 7.33 (d 8.7)                      | 130.0 (s)              | C5, 7, 8, 9, 10, 11,       |
| 8,10     | 8.08 (d 8.7)                      | 123.7 (d)              | C6, 7, 8, 9, 10, 11        |
| 9        |                                   | 146.5 (s)              |                            |

Supplementary Table 9. <sup>1</sup>H and <sup>13</sup>C NMR data for deoxyneoareothin and compound 1.

| Position | Deoxyneoareothin<br>(6)           |                        | Compound 1 <sup>#</sup>           |                        |
|----------|-----------------------------------|------------------------|-----------------------------------|------------------------|
|          | <sup>1</sup> H (J <sub>Hz</sub> ) | <sup>13</sup> C (mult) | <sup>1</sup> H (J <sub>Hz</sub> ) | <sup>13</sup> C (mult) |
| 1        |                                   |                        |                                   |                        |
| 2        |                                   | 162.1 (s)              |                                   | 162.1 (s)              |
| 2a       | 3.94 (s)                          | 55.3 (q)               | 3.97 (s)                          | 55.3 (q)               |
| 3        |                                   | 99.4 (s)               |                                   | 99.4 (s)               |
| 3a       | 1.82 (s)                          | 6.8 (q)                | 1.85 (s)                          | 6.9 (q)                |
| 4        |                                   | 180.9 (s)              |                                   | 181.0 (s)              |
| 5        |                                   | 118.5 (s)              |                                   | 118.5 (s)              |
| 5a       | 1.93 (s)                          | 9.9 (q)                | 1.97 (s)                          | 10.0 (q)               |
| 6        |                                   | 157.7 (s)              |                                   | 157.7 (s)              |
| 7        | 2.73 (t 7.5)                      | 29.7 (t)               | 2.76 (dd 7.3, 7.5)                | 29.7 (t)               |
| 8        | 2.36 (t 7.5)                      | 37.8 (t)               | 2.39 (dd 7.3, 7.5)                | 37.8 (t)               |
| 9        |                                   | 134.1 (s)              |                                   | 134.2 (s)              |
| 9a       | 1.84 (s)                          | 17.9 (q)               | 1.88 (s)                          | 17.9 (q)               |
| 10       | 5.67 (s)                          | 131.1 (d)              | 5.70 (s)                          | 131.1 (d)              |
| 11       |                                   | 134.4 (s)              |                                   | 134.5 (s)              |
| 11a      | 1.88 (s)                          | 19.2 (q)               | 1.92 (s)                          | 19.2 (q)               |
| 12       | 5.74 (s)                          | 133.8 (d)              | 5.78 (s)                          | 133.9 (d)              |
| 13       |                                   | 136.0 (s)              |                                   | 136.0 (s)              |
| 13a      | 2.00 (s)                          | 19.6 (q)               | 2.03 (s)                          | 19.6 (q)               |
| 14       | 5.92 (s)                          | 133.6 (d)              | 5.95 (s)                          | 133.6 (d)              |
| 15       |                                   | 139.7 (s)              |                                   | 139.7 (s)              |
| 15a      | 2.06 (s)                          | 19.5 (q)               | 2.09 (s)                          | 19.5 (q)               |
| 16       | 6.42 (s)                          | 127.7 (d)              | 6.46 (s)                          | 127.7 (d)              |
| 17       |                                   | 144.9 (s)              |                                   | 144.9 (s)              |
| 18,22    | 7.40 (d 8.8)                      | 129.5 (d)              | 7.43 (d 8.8)                      | 129.5 (d)              |
| 19,21    | 8.16 (d 8.8)                      | 123.5 (d)              | 8.20 (d 8.8)                      | 123.5 (d)              |
| 20       |                                   | 145.8 (s)              |                                   | 145.8 (s)              |

<sup>#</sup>: The NMR data of compound 1.<sup>32</sup>

**Supplementary Table 10. <sup>1</sup>H and <sup>13</sup>C NMR data for 11a-hydroxyneoareothin#.**

| Position | <sup>1</sup> H (J <sub>H<sub>z</sub>)</sub>    | <sup>13</sup> C (mult) | HMBC correlations (H to C) |
|----------|------------------------------------------------|------------------------|----------------------------|
| 1        |                                                |                        |                            |
| 2        |                                                | 163.4 (s)              |                            |
| 2a       | 3.96 (s)                                       | 56.4 (q)               | C2                         |
| 3        |                                                | 100.9 (s)              |                            |
| 3a       | 1.78 (s)                                       | 7.8 (q)                | C2, 3, 4                   |
| 4        |                                                | 181.4 (s)              |                            |
| 5        |                                                | 120.6 (s)              |                            |
| 5a       | 2.03 (s)                                       | 10.3 (q)               | C4, 5, 6                   |
| 6        |                                                | 156.3 (s)              |                            |
| 7        | 5.13 (brt 6.1)                                 | 73.9 (d)               | C6, 8, 9, 9a               |
| 8        | 2.91 (brdd 15.6, 5.6)<br>3.05 (brss 15.6, 6.9) | 39.0 (t)               | C6, 7, 9, 9a, 10           |
| 9        |                                                | 140.3 (s)              |                            |
| 9a       | 4.70 (d 14.0)<br>4.84 (d 14.0)                 | 70.8 (t)               | C7, 8, 9, 10               |
| 10       | 6.14 (s)                                       | 123.8 (d)              | C8, 9a, 11a, 12            |
| 11       |                                                | 137.1 (s)              |                            |
| 11a      | 4.33 (d 12.0)<br>4.36 (d 12.0)                 | 61.5 (t)               | C10, 11, 12                |
| 12       | 5.91 (s)                                       | 138.2 (d)              | C10, 11, 11a, 13a, 14      |
| 13       |                                                | 135.2 (s)              |                            |
| 13a      | 2.03 (s)                                       | 20.09 (q)              | C12, 13                    |
| 14       | 6.03 (s)                                       | 135.6 (d)              | C12, 13a, 15, 15a, 16      |
| 15       |                                                | 139.1 (s)              |                            |
| 15a      | 2.07 (s)                                       | 20.06 (q)              | C14, 15, 16                |
| 16       | 6.46 (s)                                       | 129.6 (d)              | C14, 15, 15a, 17, 18, 22   |
| 17       |                                                | 145.1 (s)              |                            |
| 18,22    | 7.42 (d 8.8)                                   | 130.3 (d)              | C16, 18, 20, 22            |
| 19,21    | 8.19 (d 8.8)                                   | 124.3 (d)              | C17, 19, 20, 21            |
| 20       |                                                | 146.7 (d)              |                            |

#Compound 7.

**Supplementary Table 11. <sup>1</sup>H and <sup>13</sup>C NMR data for 2-pyrone-4-desmethyl-7-dehydro-7-deoxyneoaureothin<sup>#</sup>.**

| Position | <sup>1</sup> H (J <sub>Hz</sub> ) | <sup>13</sup> C (mult) | HMBC correlations (H to C) |
|----------|-----------------------------------|------------------------|----------------------------|
| 1        |                                   |                        |                            |
| 2        |                                   | 166.0 (s)              |                            |
| 3        |                                   | 99.0 (s)               |                            |
| 3a       | 1.80 (s)                          | 8.3 (q)                | C2, 3, 4                   |
| 4        |                                   | 165.8 (s)              |                            |
| 5        |                                   | 108.3 (s)              |                            |
| 5a       | 1.89 (s)                          | 9.1 (q)                | C4, 5, 6                   |
| 6        |                                   | 152.7 (s)              |                            |
| 7        | 6.19 (d 15.3)                     | 114.5 (d)              | C6, 8, 9                   |
| 8        | 7.02 (d 15.3)                     | 140.0 (d)              | C6, 7, 9a, 10              |
| 9        |                                   | 133.2 (s)              |                            |
| 9a       | 1.90 (s)                          | 13.7 (q)               | C8, 9, 10                  |
| 10       | 6.14 (s)                          | 141.4 (d)              | C8, 9, 9a, 11, 11a, 12     |
| 11       |                                   | 134.2 (s)              |                            |
| 11a      | 1.92 (s)                          | 18.9 (s)               | C10, 11, 12                |
| 12       | 5.87 (s)                          | 137.2 (d)              | C10, 13a, 14               |
| 13       |                                   | 135.7 (s)              |                            |
| 13a      | 1.92 (s)                          | 19.2 (q)               | C13                        |
| 14       | 5.89 (s)                          | 134.6 (d)              | C12, 13a, 16               |
| 15       |                                   | 139.4 (s)              |                            |
| 15a      | 1.94 (s)                          | 19.1 (q)               | C14, 15, 16                |
| 16       | 6.33 (s)                          | 127.9 (d)              | C14,15a, 17, 18, 22        |
| 17       |                                   | 144.7 (s)              |                            |
| 18,22    | 7.30 (d 8.5)                      | 129.3 (d)              | C16, 18, 20, 22            |
| 19,21    | 8.03 (d 8.5)                      | 123.3 (d)              | C17, 19, 20, 21            |
| 20       |                                   | 145.5 (d)              |                            |

<sup>#</sup>Compound **8**.



**Supplementary Table 12. <sup>1</sup>H and <sup>13</sup>C NMR data for 2-pyrone-7-dehydro-7-deoxyneoaureothin<sup>#</sup>.**

| Position | <sup>1</sup> H (J <sub>Hz</sub> ) | <sup>13</sup> C (mult) | HMBC correlations (H to C) |
|----------|-----------------------------------|------------------------|----------------------------|
| 1        |                                   |                        |                            |
| 2        |                                   | 165.1 (s)              |                            |
| 3        |                                   | 110.0 (s)              |                            |
| 3a       | 2.03 (s)                          | 9.7 (q)                | C2, 3, 4                   |
| 4        |                                   | 168.3 (s)              |                            |
| 4a       | 3.79 (s)                          | 61.0 (q)               | C4                         |
| 5        |                                   | 110.9 (s)              |                            |
| 5a       | 2.05 (s)                          | 10.4 (q)               | C4, 5, 6                   |
| 6        |                                   | 153.4 (s)              |                            |
| 7        | 6.28 (d 15.4)                     | 114.7 (d)              | C6, 8, 9                   |
| 8        | 7.21 (d 15.4)                     | 140.4 (d)              | C6, 9, 9a, 10              |
| 9        |                                   | 133.4 (s)              |                            |
| 9a       | 2.04 (s)                          | 14.1 (q)               | C8, 9, 10                  |
| 10       | 6.30 (s)                          | 142.0 (d)              | C8, 9, 9a, 11a, 12         |
| 11       |                                   | 134.5 (s)              |                            |
| 11a      | 2.062 (s)                         | 19.5 (s)               | C10, 11, 12                |
| 12       | 6.02 (s)                          | 137.6 (d)              | C10, 13a, 14               |
| 13       |                                   | 134.5 (s)              |                            |
| 13a      | 2.060 (s)                         | 19.3 (q)               | C13                        |
| 14       | 6.03 (s)                          | 135.0 (d)              | C12, 13a, 16               |
| 15       |                                   | 139.6 (s)              |                            |
| 15a      | 2.09 (s)                          | 19.6 (q)               | C14, 15, 16                |
| 16       | 6.47 (s)                          | 128.2 (d)              | C14,15a, 17, 18, 22        |
| 17       |                                   | 144.8 (s)              |                            |
| 18,22    | 7.42 (d 8.8)                      | 129.5 (d)              | C16, 18, 20, 22            |
| 19,21    | 8.18 (d 8.8)                      | 123.5 (d)              | C17, 19, 20, 21            |
| 20       |                                   | 145.8 (d)              |                            |

<sup>#</sup>Compound **9**.

**Supplementary Table 13.  $^1\text{H}$  and  $^{13}\text{C}$  NMR data for 7-dehydro-7-deoxyneoaureothin<sup>#</sup>.**

| Position | $^1\text{H}$ ( $J_{\text{Hz}}$ ) | $^{13}\text{C}$ (mult) | HMBC correlations (H to C) |
|----------|----------------------------------|------------------------|----------------------------|
| 1        |                                  |                        |                            |
| 2        |                                  | 161.7 (s)              |                            |
| 2a       | 4.06 (s)                         | 55.4 (q)               | C2                         |
| 3        |                                  | 99.6 (s)               |                            |
| 3a       | 1.87 (s)                         | 7.0 (q)                | C2, 3, 4                   |
| 4        |                                  | 181.0 (s)              |                            |
| 5        |                                  | 118.5 (s)              |                            |
| 5a       | 2.061 (s)                        | 9.7 (q)                | C4, 5, 6                   |
| 6        |                                  | 152.6 (s)              |                            |
| 7        | 6.44 (d 15.5)                    | 116.2 (d)              | C6, 8, 9                   |
| 8        | 6.95 (d 15.5)                    | 139.3 (d)              | C6, 9a, 10                 |
| 9        |                                  | 133.3 (s)              |                            |
| 9a       | 2.074 (s)                        | 14.1 (q)               | C8, 9, 10                  |
| 10       | 6.25 (s)                         | 141.7 (d)              | C8, 9a, 11a, 12            |
| 11       |                                  | 134.1 (s)              |                            |
| 11a      | 2.08 (s)                         | 19.3 (s)               | C10, 11, 12                |
| 12       | 6.041 (s)                        | 137.6 (d)              | C10, 13a, 14               |
| 13       |                                  | 135.7 (s)              |                            |
| 13a      | 2.066 (s)                        | 19.6 (q)               | C13                        |
| 14       | 6.035 (s)                        | 135.1 (d)              | C12, 13a, 16               |
| 15       |                                  | 139.4 (s)              |                            |
| 15a      | 2.09 (s)                         | 19.5 (q)               | C14, 15                    |
| 16       | 6.47 (s)                         | 128.3 (d)              | C14,15a, 17, 18, 22        |
| 17       |                                  | 144.7 (s)              |                            |
| 18,22    | 7.42 (d 9.0)                     | 129.5 (d)              | C16, 18, 20, 22            |
| 19,21    | 8.18 (d 9.0)                     | 123.5 (d)              | C17, 19, 20, 21            |
| 20       |                                  | 145.9 (d)              |                            |

<sup>#</sup>Compound **10**.

## Supplementary References

1. Buchholz, T.J. et al. Structural basis for binding specificity between subclasses of modular polyketide synthase docking domains. *ACS Chem. Biol.* **4**, 41-52 (2009).
2. Dorival, J. et al. Characterization of Intersubunit Communication in the Virginiamycin trans-Acyl Transferase Polyketide Synthase. *J. Am. Chem. Soc.* **138**, 4155-4167 (2016).
3. Broadhurst, R.W., Nietlispach, D., Wheatcroft, M.P., Leadlay, P.F. & Weissman, K.J. The structure of docking domains in modular polyketide synthases. *Chem. Biol.* **10**, 723-731 (2003).
4. Whicher, J.R. et al. Cyanobacterial polyketide synthase docking domains: a tool for engineering natural product biosynthesis. *Chem. Biol.* **20**, 1340-1351 (2013).
5. Thattai, M., Burak, Y. & Shraiman, B.I. The origins of specificity in polyketide synthase protein interactions. *PLoS Comput. Biol.* **3**, 1827-1835 (2007).
6. Sievers, F. et al. Fast, scalable generation of high-quality protein multiple sequence alignments using Clustal Omega. *Mol. Syst. Biol.* **7**, 539 (2011).
7. Waterhouse, A.M., Procter, J.B., Martin, D.M., Clamp, M. & Barton, G.J. Jalview Version 2--a multiple sequence alignment editor and analysis workbench. *Bioinformatics* **25**, 1189-1191 (2009).
8. Caffrey, P., Bevitt, D.J., Staunton, J. & Leadlay, P.F. Identification of DEBS 1, DEBS 2 and DEBS 3, the multienzyme polypeptides of the erythromycin-producing polyketide synthase from *Saccharopolyspora erythraea*. *FEBS Lett.* **304**, 225-228 (1992).
9. Xue, Y., Zhao, L., Liu, H.W. & Sherman, D.H. A gene cluster for macrolide antibiotic biosynthesis in *Streptomyces venezuelae*: architecture of metabolic diversity. *Proc. Natl. Acad. Sci. U. S. A.* **95**, 12111-12116 (1998).
10. Caffrey, P., Lynch, S., Flood, E., Finnan, S. & Oliynyk, M. Amphotericin biosynthesis in *Streptomyces nodosus*: deductions from analysis of polyketide synthase and late genes. *Chem. Biol.* **8**, 713-723 (2001).
11. Yu, T.W. et al. The biosynthetic gene cluster of the maytansinoid antitumor agent ansamitocin from *Actinosynnema pretiosum*. *Proc. Natl. Acad. Sci. U. S. A.* **99**, 7968-7973 (2002).
12. Brautaset, T. et al. Biosynthesis of the polyene antifungal antibiotic nystatin in *Streptomyces noursei* ATCC 11455: analysis of the gene cluster and deduction of the biosynthetic pathway. *Chem. Biol.* **7**, 395-403 (2000).
13. Oliynyk, M. et al. Analysis of the biosynthetic gene cluster for the polyether antibiotic monensin in *Streptomyces cinnamonensis* and evidence for the role of monB and monC genes in oxidative cyclization. *Mol. Microbiol.* **49**, 1179-1190 (2003).
14. Waldron, C. et al. Cloning and analysis of the spinosad biosynthetic gene cluster of *Saccharopolyspora spinosa*. *Chem. Biol.* **8**, 487-499 (2001).
15. Castonguay, R. et al. Stereospecificity of ketoreductase domains 1 and 2 of the tylactone modular polyketide synthase. *J. Am. Chem. Soc.* **130**, 11598-11599 (2008).
16. Aparicio, J.F., Colina, A.J., Ceballos, E. & Martin, J.F. The biosynthetic gene cluster for the 26-membered ring polyene macrolide pimaricin. A new polyketide synthase organization encoded by two subclusters separated by functionalization genes. *J. Biol. Chem.* **274**, 10133-10139 (1999).
17. August, P.R. et al. Biosynthesis of the ansamycin antibiotic rifamycin: deductions from the molecular analysis of the rif biosynthetic gene cluster of *Amycolatopsis mediterranei* S699. *Chem. Biol.* **5**, 69-79 (1998).
18. Yuzawa, S. et al. Comprehensive in vitro analysis of acyltransferase domain exchanges in modular polyketide synthases and its application for short-chain ketone production. *ACS Synth. Biol.* **6**, 139-147 (2017).
19. Kelley, L.A., Mezulis, S., Yates, C.M., Wass, M.N. & Sternberg, M.J. The Phyre2 web portal for protein modeling, prediction and analysis. *Nat. Protoc.* **10**, 845-858 (2015).

20. Maier, T., Leibundgut, M. & Ban, N. The crystal structure of a mammalian fatty acid synthase. *Science* **321**, 1315-1322 (2008).
21. Ikeda, H., Nonomiya, T., Usami, M., Ohta, T. & Omura, S. Organization of the biosynthetic gene cluster for the polyketide anthelmintic macrolide avermectin in *Streptomyces avermitilis*. *Proc. Natl. Acad. Sci. U. S. A.* **96**, 9509-9514 (1999).
22. Omura, S. et al. Genome sequence of an industrial microorganism *Streptomyces avermitilis*: deducing the ability of producing secondary metabolites. *Proc. Natl. Acad. Sci. U. S. A.* **98**, 12215-12220 (2001).
23. Shah, S. et al. Cloning, characterization and heterologous expression of a polyketide synthase and P-450 oxidase involved in the biosynthesis of the antibiotic oleandomycin. *J. Antibiot. (Tokyo)* **53**, 502-508 (2000).
24. Kakavas, S.J., Katz, L. & Stassi, D. Identification and characterization of the niddamycin polyketide synthase genes from *Streptomyces caelestis*. *J. Bacteriol.* **179**, 7515-7522 (1997).
25. Motamedi, H., Cai, S.J., Shafiee, A. & Elliston, K.O. Structural organization of a multifunctional polyketide synthase involved in the biosynthesis of the macrolide immunosuppressant FK506. *Eur. J. Biochem.* **244**, 74-80 (1997).
26. Schwecke, T. et al. The biosynthetic gene cluster for the polyketide immunosuppressant rapamycin. *Proc. Natl. Acad. Sci. U. S. A.* **92**, 7839-7843 (1995).
27. Sun, Y. et al. A complete gene cluster from *Streptomyces nanchangensis* NS3226 encoding biosynthesis of the polyether ionophore nanchangmycin. *Chem. Biol.* **10**, 431-441 (2003).
28. Carmody, M. et al. Biosynthesis of amphotericin derivatives lacking exocyclic carboxyl groups. *J. Biol. Chem.* **280**, 34420-34426 (2005).
29. Chen, S. et al. Organizational and mutational analysis of a complete FR-008/candicidin gene cluster encoding a structurally related polyene complex. *Chem. Biol.* **10**, 1065-1076 (2003).
30. Anzai, Y. et al. Organization of the biosynthetic gene cluster for the polyketide macrolide mycinamicin in *Micromonospora griseorubida*. *FEMS Microbiol. Lett.* **218**, 135-141 (2003).
31. Volchegursky, Y., Hu, Z., Katz, L. & McDaniel, R. Biosynthesis of the anti-parasitic agent megalomicin: transformation of erythromycin to megalomicin in *Saccharopolyspora erythraea*. *Mol. Microbiol.* **37**, 752-762 (2000).
32. Liu, C.X. et al. A new spectinabilin derivative with cytotoxic activity from ant-derived *Streptomyces* sp. 1H-GS5. *J. Asian Nat. Prod. Res.* **19**, 924-929 (2017).
